# Supplementary material
Source: MDPI journal article supplement (https://www.mdpi.com/1424-8247/15/6/703)
Supplement: s1 [file s1]

# Nano-silica carriers coated by chloramphenicol: synthesis, characterization, and grinding trial as a way to improve the re-lease profile

Radosław Balwierz <sup>1\*</sup>, Dawid Bursy <sup>2</sup>, Paweł Biernat <sup>2</sup>, Nataliai Hudz <sup>1,3</sup>, Mariia Shanaida <sup>4</sup>, Łukasz Krzemiński <sup>5</sup>, Paweł Skóra <sup>6</sup>, Monika Biernat <sup>7</sup> and Wioletta Ochędzan Siodłak <sup>1</sup>

- <sup>1</sup> Faculty of Chemistry, University of Opole, Oleska 48, 45-052 Opole, Poland; radoslaw.balwierz@uni.opole.pl (R.B); wsiodlak@uni.opole.pl (W.S).
- <sup>2</sup> Department of Drug Forms Technology, Faculty of Pharmacy, Wrocław Medical University, 50-556 Wrocław, Poland; dawid.bursy@umed.wroc.pl (D.B); pawel.biernat@umed.wroc.pl (P.B).
- <sup>3</sup> Department of Drug Technology and Biopharmaceutics, Danylo Halytsky Lviv National Medical University, 79010 Lviv, Ukraine; natali\_gudz@ukr.net
- <sup>4</sup> Department of Pharmacognosy and Medical Botany, I. Horbachevsky Ternopil National Medical University, 46001 Ternopil, Ukraine; shanayda@tdmu.edu.ua
- <sup>5</sup> Nanotechnology and Materials Technology Scientific and Didactic Laboratory, Faculty of Mechanical Engineering, Silesian University of Technology, 44-100 Gliwice, Poland; lukasz.krzeminski@polsl.pl
- <sup>6</sup> Department of Inorganic Chemistry, Analytical Chemistry and Electrochemistry, Faculty of Chemistry, Silesian University of Technology, 44-100 Gliwice, Poland; pawel.skora@polsl.pl
- <sup>7</sup> Department of Haematology, Blood Neoplasms and Bone Marrow Transplantation, Wrocław Medical University, 50-367 Wrocław, Poland; mobiernat@gmail.com
- \* Correspondence: radoslaw.balwierz@uni.opole.pl

| Table of contents                                                                                                                                          | p.       |
|------------------------------------------------------------------------------------------------------------------------------------------------------------|----------|
| <b>The scheme of the experiment</b>                                                                                                                        | <b>4</b> |
| <b>Section 1: Material analysis</b>                                                                                                                        | <b>5</b> |
| <b>Figure S1.</b> BET and BJH analysis of silica carrier <b>A</b>                                                                                          | 5        |
| <b>Figure S2.</b> BET and BJH analysis of silica carrier <b>B</b>                                                                                          | 6        |
| <b>Figure S3.</b> BET and BJH analysis of silica carrier <b>C</b>                                                                                          | 7        |
| <b>Figure S4.</b> BET and BJH analysis of silica carrier <b>D</b>                                                                                          | 8        |
| <b>Figure S5.</b> BET and BJH analysis of silica carrier <b>E</b>                                                                                          | 9        |
| <b>Figure S6.</b> BET and BJH analysis of silica carrier <b>F</b>                                                                                          | 10       |
| <b>Figure S7.</b> BET and BJH analysis silica carrier with chloramphenicol <b>D_CIPh</b>                                                                   | 11       |
| <b>Figure S8.</b> Particle size distribution of silica carrier <b>A</b>                                                                                    | 12       |
| <b>Figure S9.</b> Particle size distribution of silica carrier <b>B</b>                                                                                    | 12       |
| <b>Figure S10.</b> Particle size distribution of silica carrier <b>C</b>                                                                                   | 13       |
| <b>Table S1.</b> Statistical summary of particle size measurements for silica carriers <b>A-C</b> obtained using the dynamic light scattering (DLS) method | 13       |
| <b>Figure S11.</b> Particle size distribution of silica carrier <b>D</b>                                                                                   | 13       |
| <b>Figure S12.</b> Particle size distribution of silica carrier <b>E</b>                                                                                   | 14       |
| <b>Figure S13.</b> Particle size distribution of silica carrier <b>F</b>                                                                                   | 14       |
| <b>Table S2.</b> Statistical summary of particle size measurements for silica carriers <b>D-F</b> obtained using the dynamic light scattering (DLS) method | 14       |
| <b>Figure S14.</b> Particle size distribution of silica carrier with chloramphenicol <b>A_CIPh</b>                                                         | 15       |

## Supplementary Materials

|                                                                                                                                                                                  |    |
|----------------------------------------------------------------------------------------------------------------------------------------------------------------------------------|----|
| <b>Figure S15.</b> Particle size distribution of grinded silica carrier with chloramphenicol <b>D_CIPh</b>                                                                       | 15 |
| <b>Table S3.</b> Statistical summary of particle size measurements for silica materials <b>A_CIPh</b> and <b>D_CIPh</b> obtained using the dynamic light scattering (DLS) method | 15 |
| <b>Figure S16.</b> XRD pattern of silica carrier <b>A</b>                                                                                                                        | 16 |
| <b>Figure S17.</b> XRD pattern of silica carrier with chloramphenicol <b>A_CIPh</b>                                                                                              | 16 |
| <b>Figure S18.</b> TGA curves of silica carrier <b>A</b>                                                                                                                         | 17 |
| <b>Figure S19.</b> TGA curves of silica carrier <b>B</b>                                                                                                                         | 17 |
| <b>Figure S20.</b> TGA curves of silica carrier <b>C</b>                                                                                                                         | 18 |
| <b>Figure S21.</b> TGA curves of grinded silica carrier <b>D</b>                                                                                                                 | 18 |
| <b>Figure S22.</b> TGA curves of grinded silica carrier <b>E</b>                                                                                                                 | 19 |
| <b>Figure S23.</b> TGA curves of silica carrier <b>F</b>                                                                                                                         | 19 |
| <b>Figure S24.</b> TGA curves of silica carrier with chloramphenicol <b>A_CIPh</b>                                                                                               | 20 |
| <b>Figure S25.</b> TGA curves of grinded silica carrier with chloramphenicol <b>D_CIPh</b>                                                                                       | 20 |
| <b>Section 2: Dissolution study of chloramphenicol from carbopol-based gels</b>                                                                                                  | 21 |
| <b>Table S4.</b> Volume of acceptor fluid during release testing                                                                                                                 | 21 |
| <b>Figure S26.</b> Calibration curve for chloramphenicol at 278 nm                                                                                                               | 21 |
| <b>Table S5.</b> Weights of pure chloramphenicol gel without silica nanoparticles (BN) and calculated total contents BN                                                          | 22 |
| <b>Table S6.</b> Weights chloramphenicol gel with grinded silica nanoparticles and calculated total contents <b>D_CIPh</b>                                                       | 22 |
| <b>Table S7.</b> Weights of chloramphenicol gel with silica nanoparticles and calculated total contents <b>A_CIPh</b>                                                            | 22 |
| <b>Table S8.</b> Calculated amount of chloramphenicol in the dissolution vessel after time, from formulation without silica nanoparticles BN.                                    | 22 |
| <b>Table S9.</b> Calculated amount of chloramphenicol in the dissolution vessel after time, from formulation with grinded silica nanoparticles <b>D_CIPh</b>                     | 23 |
| <b>Table S10.</b> Calculated amount of chloramphenicol in the dissolution vessel after time, from formulation with silica nanoparticles <b>A_CIPh</b>                            | 23 |
| <b>Table S11.</b> Calculated amounts of chloramphenicol that left the vessel after a given time point from formulation without silica nanoparticles BN                           | 23 |
| <b>Table S12.</b> Calculated amounts of chloramphenicol that left the vessel after a given time point from formulation with grinded silica nanoparticles <b>D_CIPh</b>           | 24 |
| <b>Table S13.</b> Calculated amounts of chloramphenicol that left the vessel after a given time point from formulation with silica nanoparticles <b>A_CIPh</b>                   | 24 |
| <b>Table S14.</b> The cumulative amount of the released chloramphenicol from formulation without silica nanoparticles BN                                                         | 25 |
| <b>Table S15.</b> The cumulative amount of the released chloramphenicol from formulation with grinded silica nanoparticles <b>D_CIPh</b>                                         | 25 |
| <b>Table S16.</b> The cumulative amount of the released chloramphenicol from formulation with silica nanoparticles <b>A_CIPh</b>                                                 | 25 |

## Supplementary Materials

|                                                                                                                                                                          |    |
|--------------------------------------------------------------------------------------------------------------------------------------------------------------------------|----|
| <b>Table S17.</b> Released percent of active substance after each time point for all tested formulations.                                                                | 26 |
| <b>Section 3: Model dependent analysis</b>                                                                                                                               | 27 |
| <b>Table S18.</b> First-order kinetics model calculation                                                                                                                 | 27 |
| <b>Table S19.</b> First-order kinetics model parameters                                                                                                                  | 27 |
| <b>Table S20.</b> Calculation of zero order kinetics                                                                                                                     | 28 |
| <b>Table S21. Zero-order kinetics parameters</b>   <b>Table S22.</b> Higuchi model calculation                                                                           | 28 |
| <b>Table S22.</b> Higuchi model calculation                                                                                                                              | 29 |
| <b>Table S23.</b> Higuchi model parameters                                                                                                                               | 29 |
| <b>Table S24.</b> Hixson-Crowell model calculation                                                                                                                       | 30 |
| <b>Table S25.</b> Hixson-Crowell model parameters                                                                                                                        | 30 |
| <b>Table S26.</b> Korsmeyer-Peppas model calculation                                                                                                                     | 31 |
| <b>Table S27.</b> Korsmeyer-Peppas model Parameters                                                                                                                      | 31 |
| <b>Section 4: Model independent analysis</b>                                                                                                                             | 32 |
| <b>Table S28.</b> Analysis of Variance, variable: DE                                                                                                                     | 32 |
| <b>Table S29.</b> Levene Test of Homogeneity of Variances, variable: DE                                                                                                  | 32 |
| <b>Table S30.</b> Breakdown descriptive statistics, variable: DE                                                                                                         | 33 |
| <b>Figure S27.</b> Categorized box whisker plot of dissolution efficiency                                                                                                | 33 |
| <b>Table S31.</b> Fisher's Least significant difference test, variable: DE                                                                                               | 34 |
| <b>Figure S28.</b> Probability plot, variable: DE                                                                                                                        | 34 |
| <b>Table S32.</b> Calculation of the Mean Dissolution time for each formulation                                                                                          | 35 |
| <b>Table S33.</b> Mean dissolution time (MDT) for tested formulations                                                                                                    | 35 |
| <b>Section 5: Weibull Model</b>                                                                                                                                          | 36 |
| <b>Table S34.</b> Weibull function nonlinear estimation parameters                                                                                                       | 36 |
| <b>Figure S29.</b> Plot of the fit to the Weibull model. In red is the function for the <b>D_CIPh</b> formulation, in yellow for <b>A_CIPh</b> and in blue for <b>BN</b> | 37 |
| <b>Table S35.</b> ANOVA for the Weibull model                                                                                                                            | 37 |
| <b>Table S36.</b> Mahalanoubis distance (MSD)                                                                                                                            | 38 |
| <b>Table S37.</b> Similarity and difference coefficients (F1,F2)                                                                                                         | 38 |

## Supplementary Materials

### The scheme of the experiment

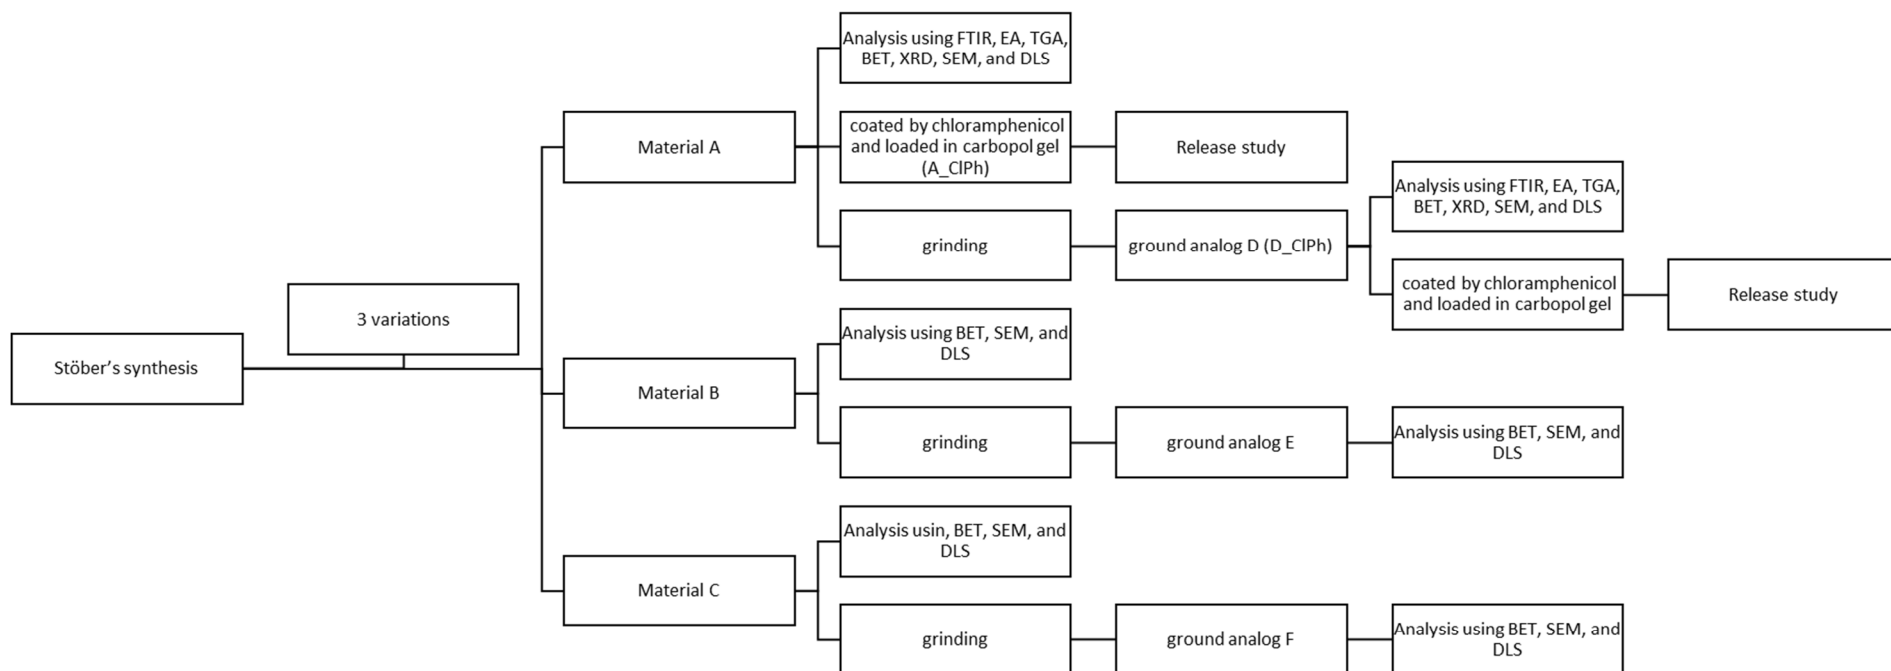

Materials A – C obtained using Stöber's synthesis; material D – F obtained after grinding materials A – C; A\_CIPh - formulation based on carrier A and chloramphenicol (1:1); D\_CIPh - formulation based on carrier D and chloramphenicol (1:1); FTIR - Fourier transform infrared spectroscopy; , BET - Brunauer–Emmett–Teller method, EA - elemental analysis, TGA - thermogravimetric analysis, , XRD - X-ray diffraction study; SEM - scanning electron microscope; DLS - dynamic light scattering

## Supplementary Materials

### Section 1: Material analysis

#### Silica A

35,0244

±

0,1613

m<sup>2</sup>/g

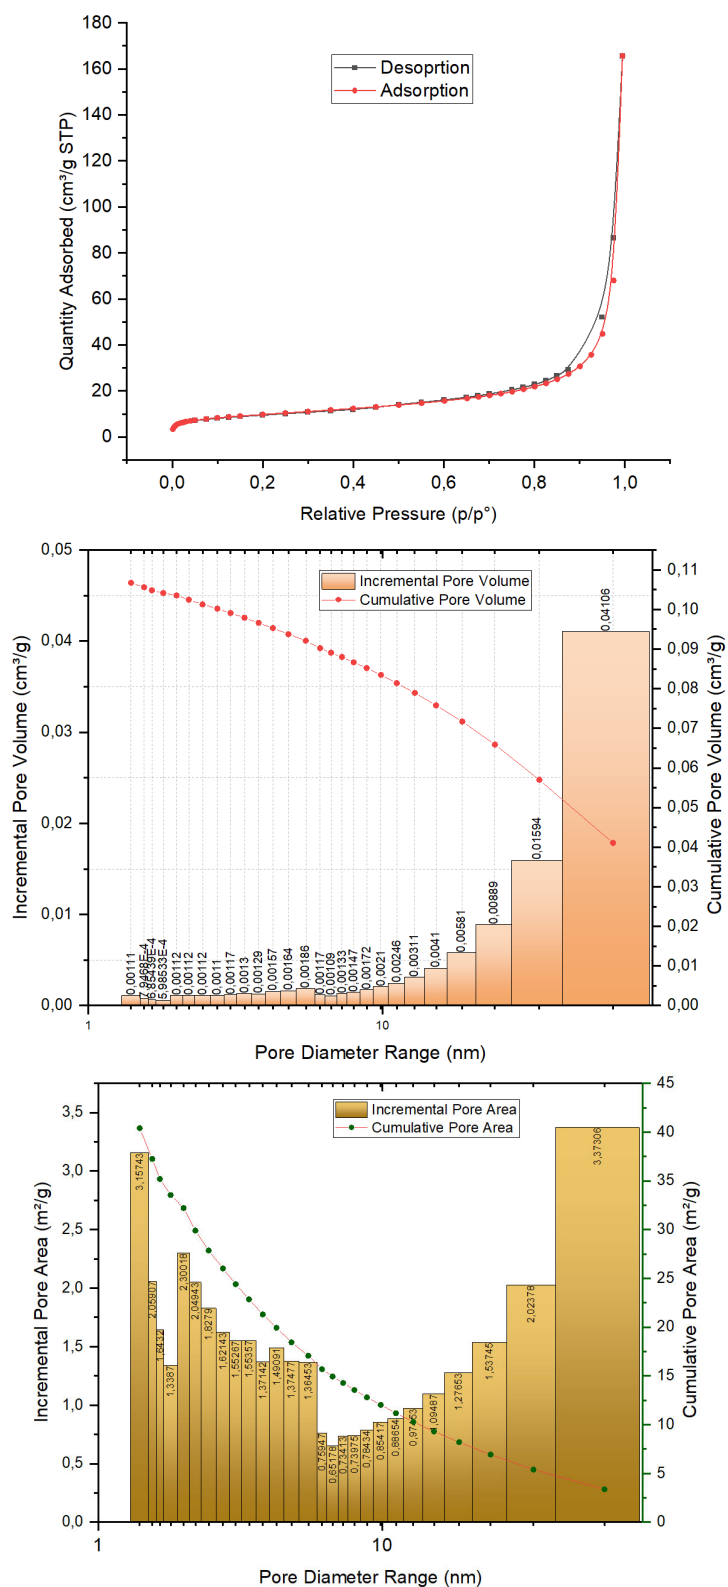

Figure S1. BET and BJH analysis of silica carrier A

## Supplementary Materials

### Silica B

32,8918

±

0,3282 m<sup>2</sup>/g

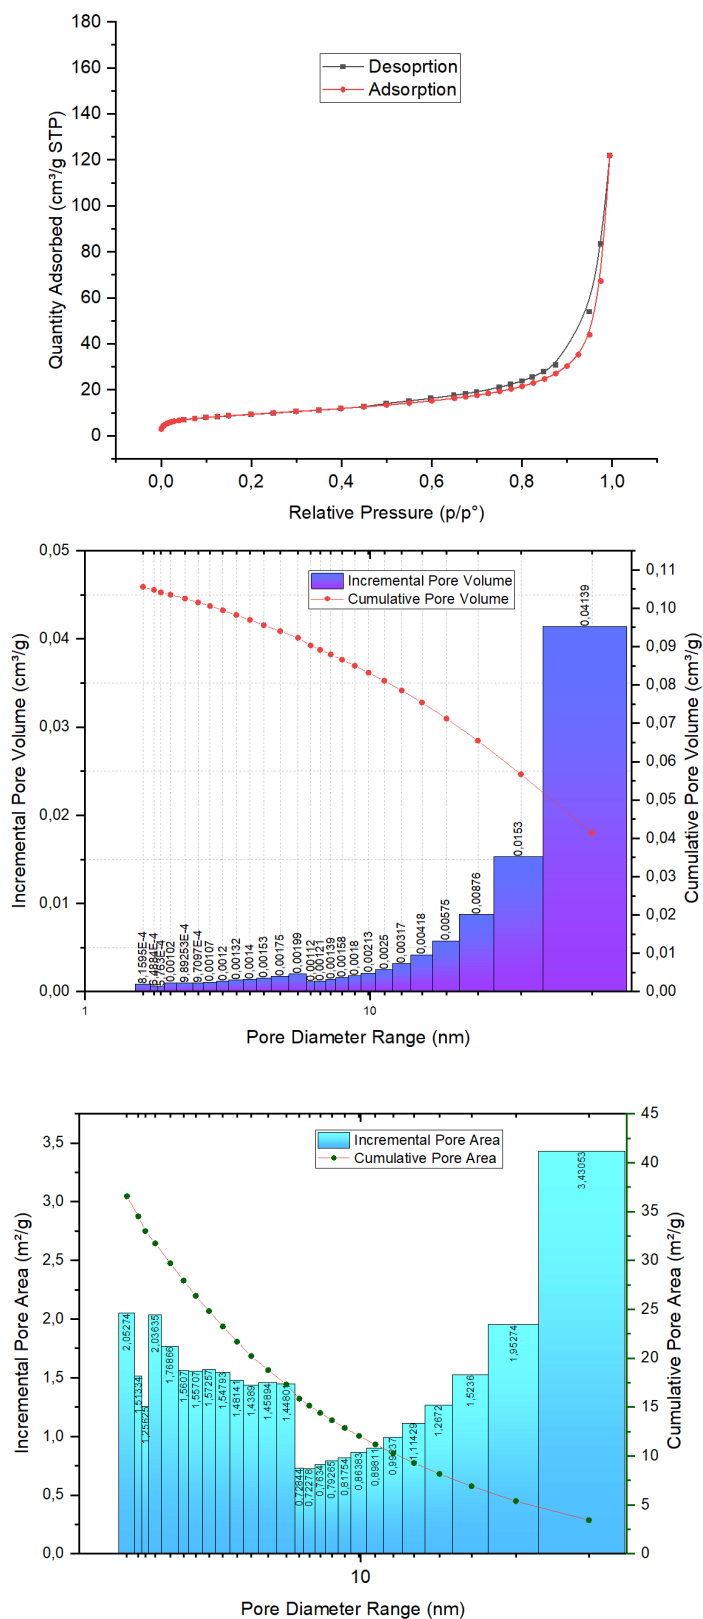

**Figure S2.** BET and BJH analysis of silica carrier **B**

## Supplementary Materials

### Silica C

32,7435

±

0,2081 m<sup>2</sup>/g

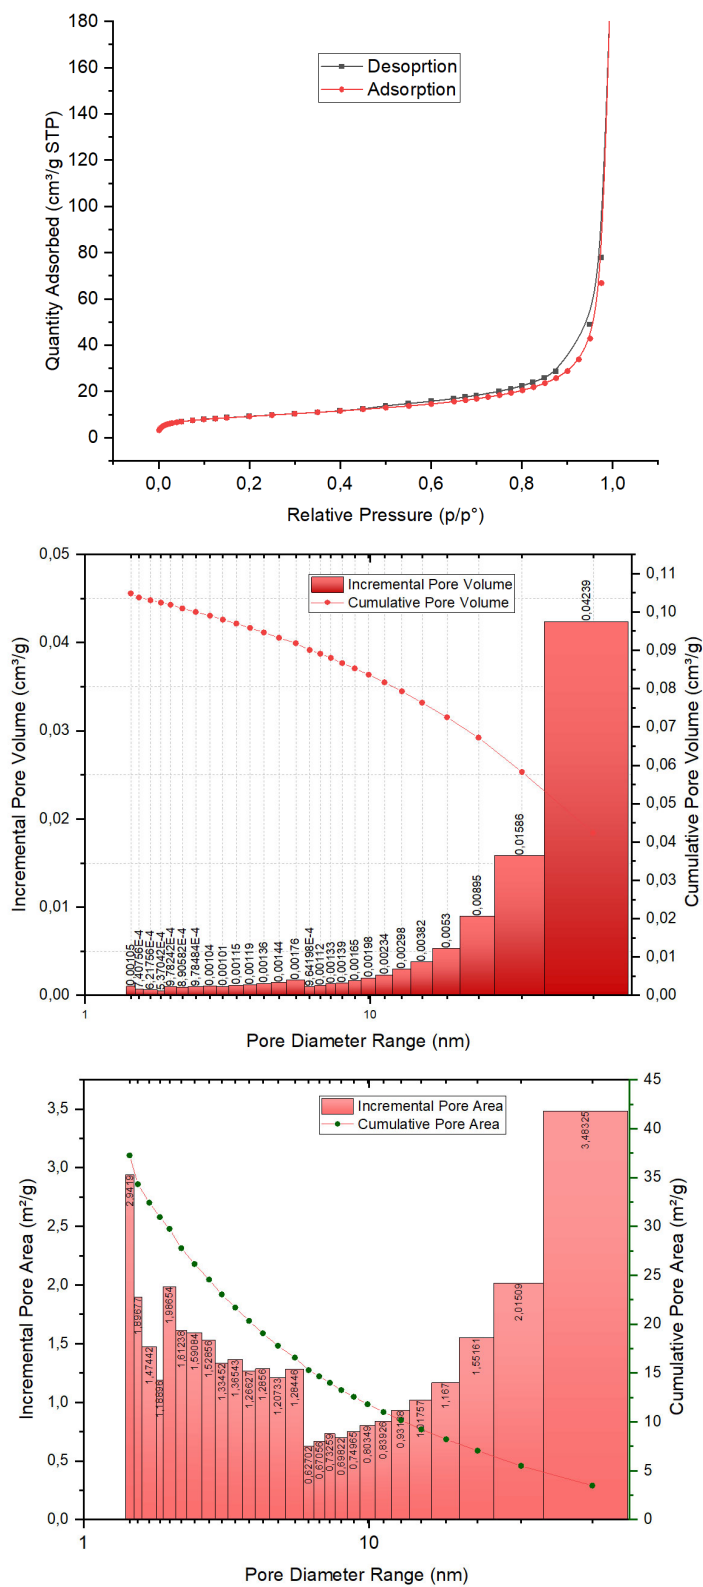

**Figure S3.** BET and BJH analysis of silica carrier C

## Supplementary Materials

### Silica D

0,1871

±

0,0203 m<sup>2</sup>/g

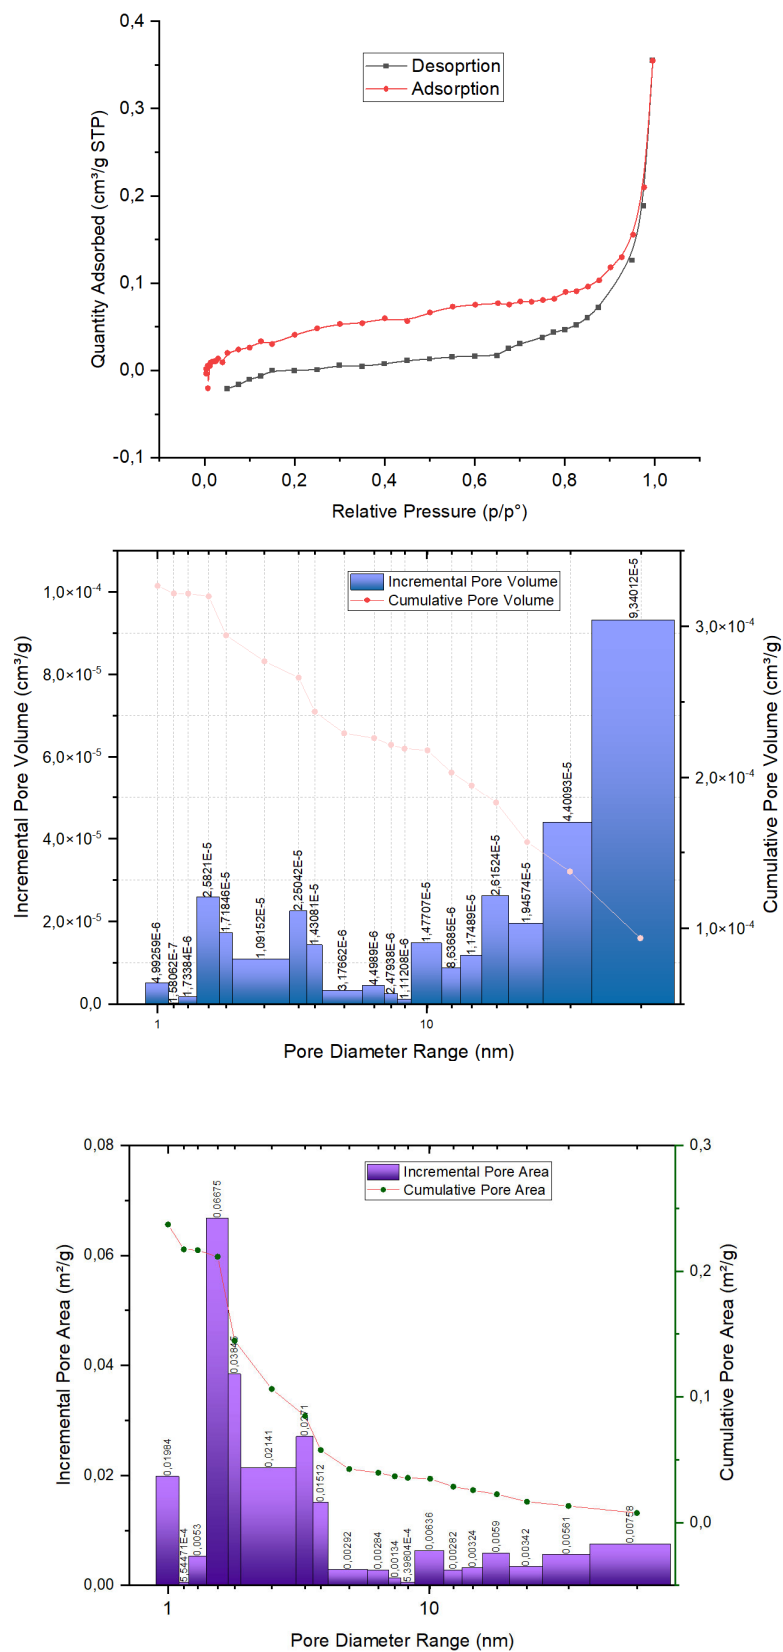

**Figure S4.** BET and BJH analysis of silica carrier **D**

## Supplementary Materials

### Silica E

$13,8976 \pm$   
 $0,0817 \text{ m}^2/\text{g}$

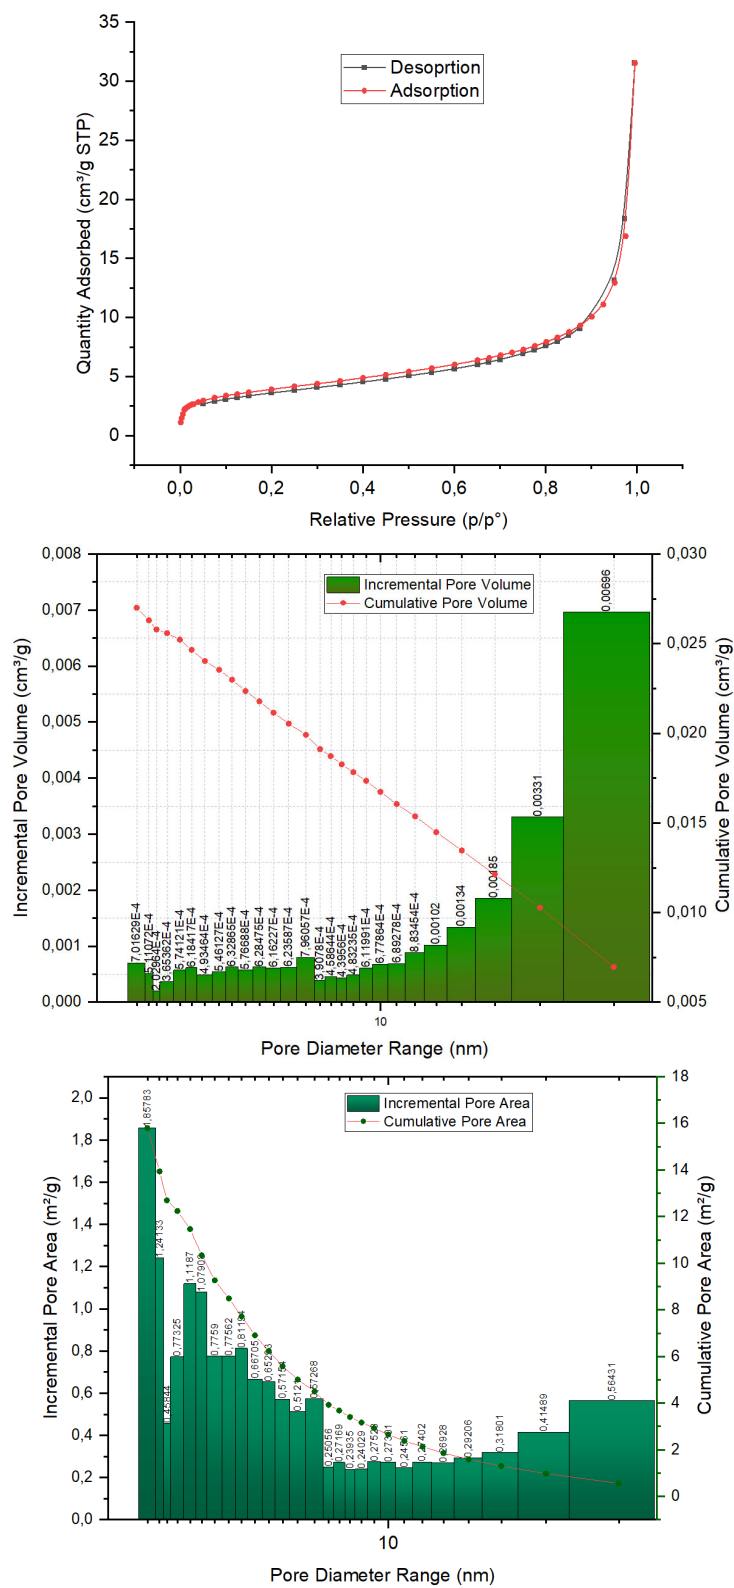

**Figure S5.** BET and BJH analysis of silica carrier E

## Supplementary Materials

### Silica F

23,8035 ±  
0,1482 m<sup>2</sup>/g

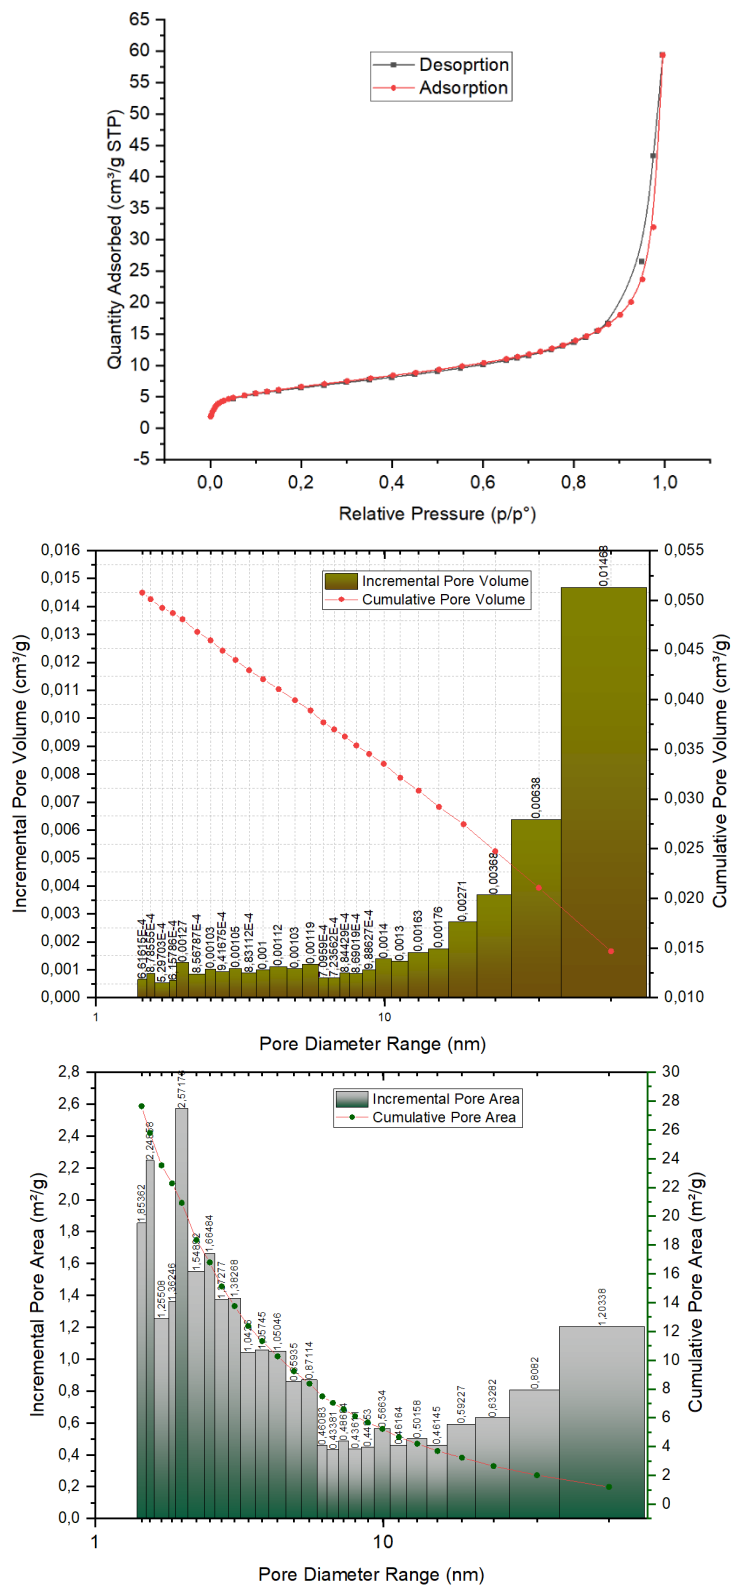

**Figure S6.** BET and BJH analysis of silica carrier F

## Supplementary Materials

### MATERIAL

#### D\_CIPh

3,3736

±

0,0457 m<sup>2</sup>/g

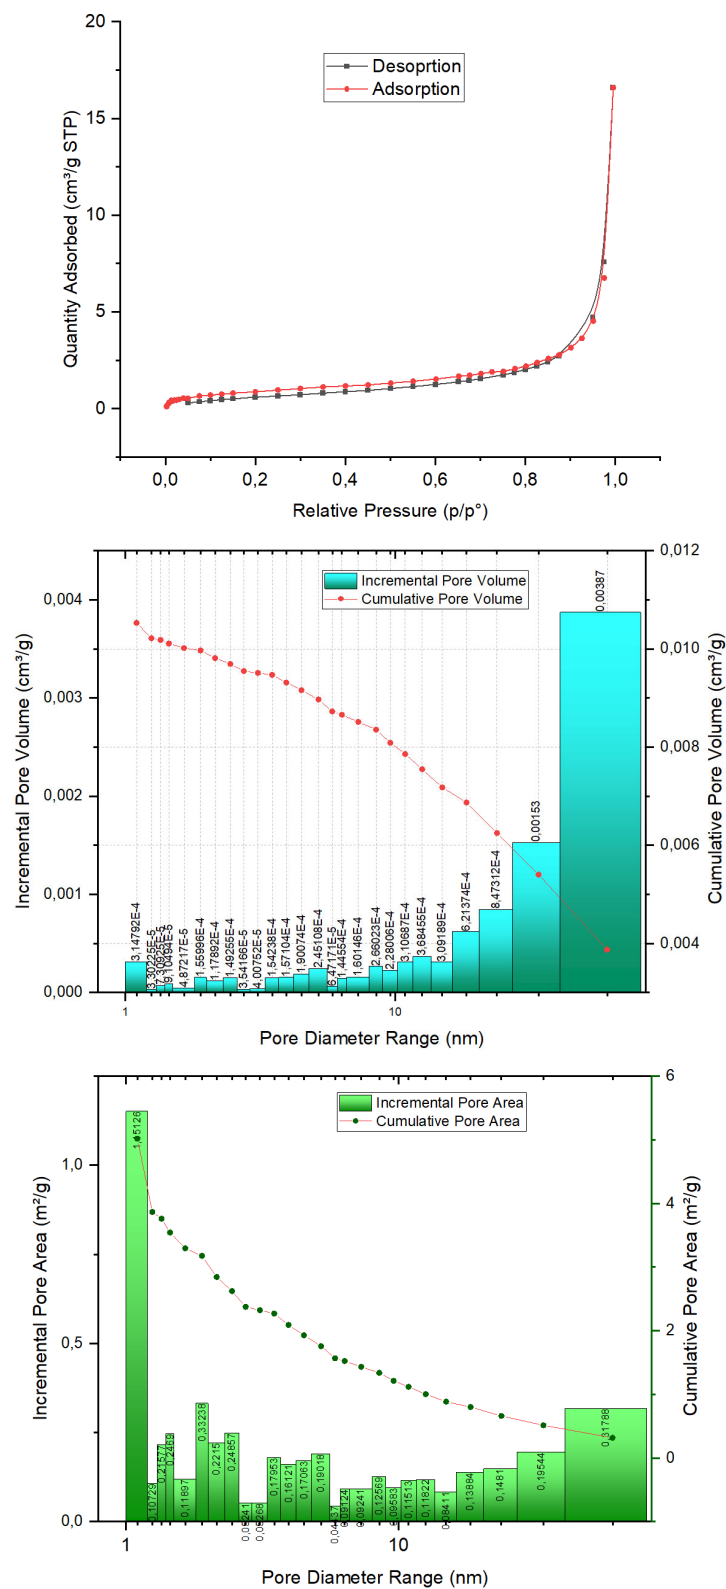

**Figure S7.** BET and BJH analysis of silica carrier with chloramphenicol **D\_CIPh**

## Supplementary Materials

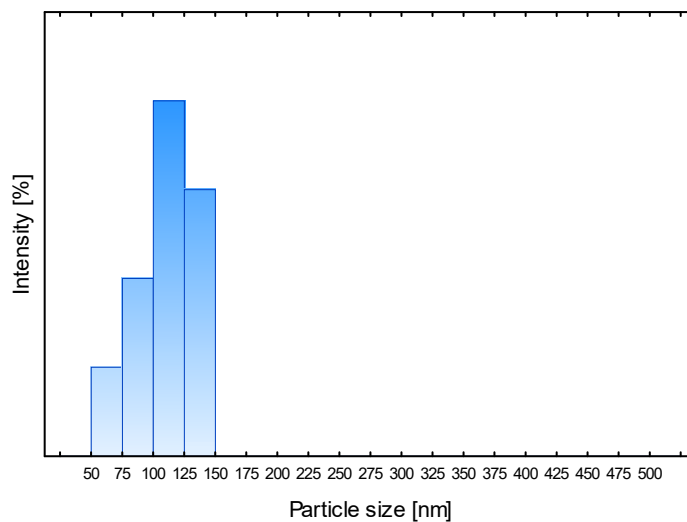

**Figure S8.** Particle size distribution of silica carrier **A**

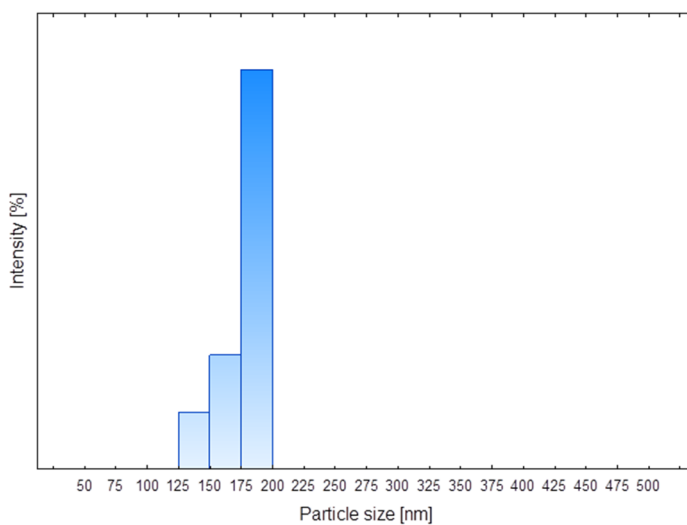

**Figure S9.** Particle size distribution of silica carrier **B**

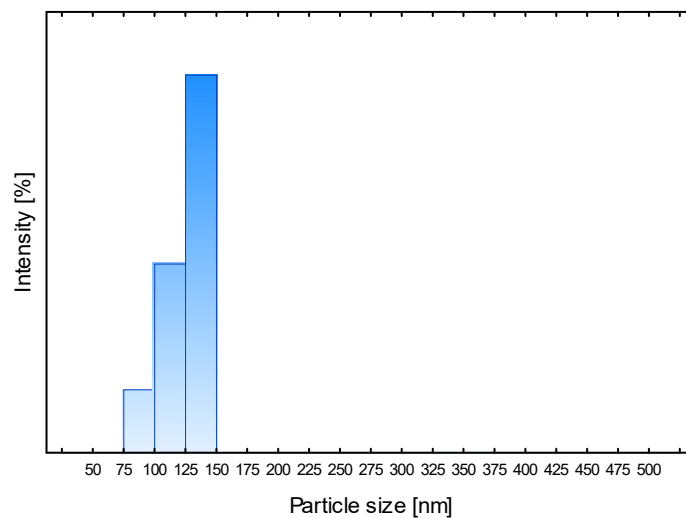

**Figure S10.** Particle size distribution of silica carrier **C**

**Table S1.** Statistical summary of particle size measurements for silica carriers **A-C** obtained using the dynamic light scattering (DLS) method

| Silica carrier | Mean  | Std.Dev. | RSD   | Minimum | Median | Maximum |
|----------------|-------|----------|-------|---------|--------|---------|
| <b>A</b>       | 107.7 | 22.0     | 20.4% | 62.8    | 112.8  | 131.0   |
| <b>B</b>       | 181.4 | 16.0     | 8.8%  | 143.8   | 186.6  | 196.9   |
| <b>C</b>       | 125.1 | 16.0     | 12.8% | 84.2    | 131.9  | 137.3   |

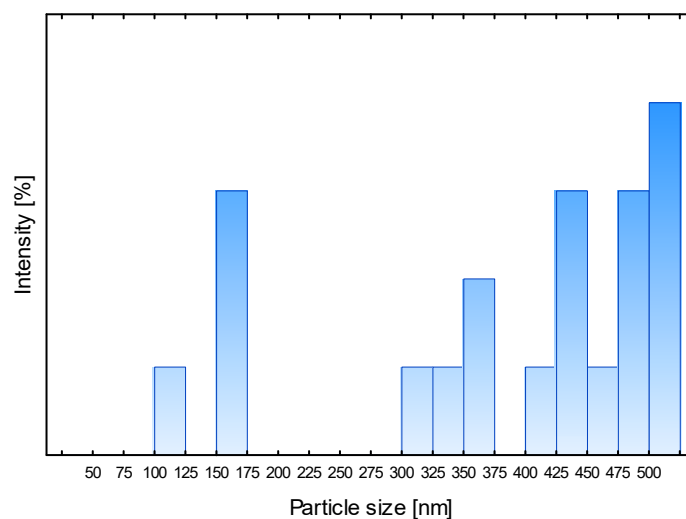

**Figure S11.** Particle size distribution of silica carrier **D**

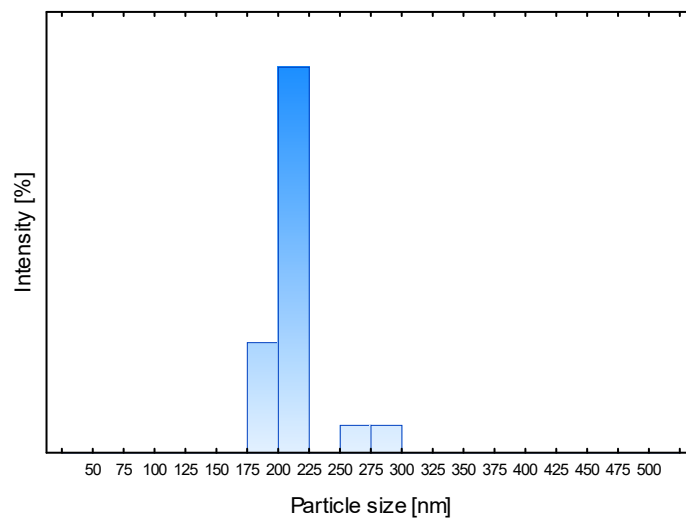

**Figure S12.** Particle size distribution of silica carrier **E**

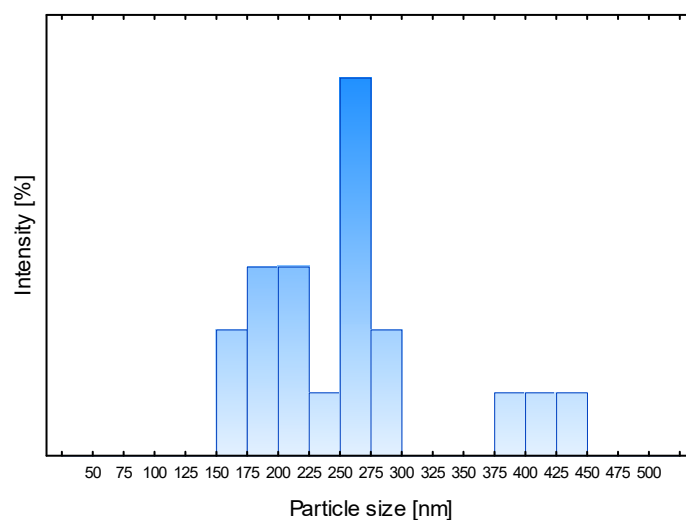

**Figure S13.** Particle size distribution of silica carrier **F**

**Table S2.** Statistical summary of particle size measurements for silica carriers **D-F** obtained using the dynamic light scattering (DLS) method

| Grinded silica carrier | Mean  | Std.Dev. | RSD   | Minimum | Median | Maximum |
|------------------------|-------|----------|-------|---------|--------|---------|
| <b>D</b>               | 389.7 | 139.3    | 35.7% | 112.2   | 438.0  | 556.5   |
| <b>E</b>               | 215.3 | 23.3     | 10.8% | 188.8   | 212.9  | 289.2   |
| <b>F</b>               | 260.0 | 77.8     | 29.9% | 168.7   | 257.3  | 440.4   |

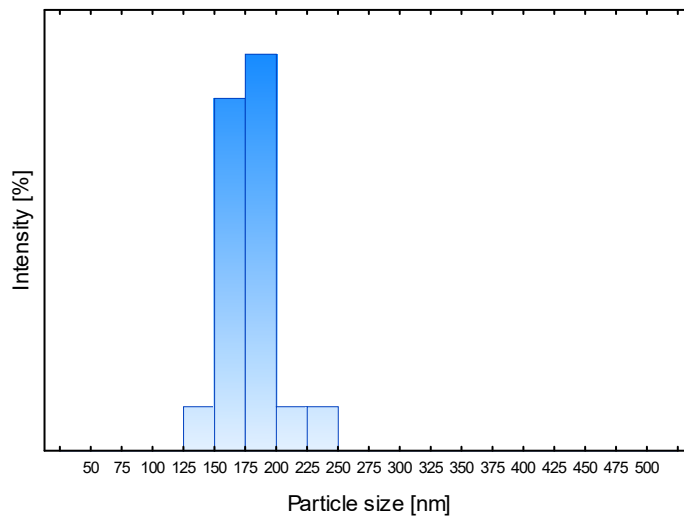

**Figure S14.** Particle size distribution of silica carrier with chloramphenicol **A\_CIPh**

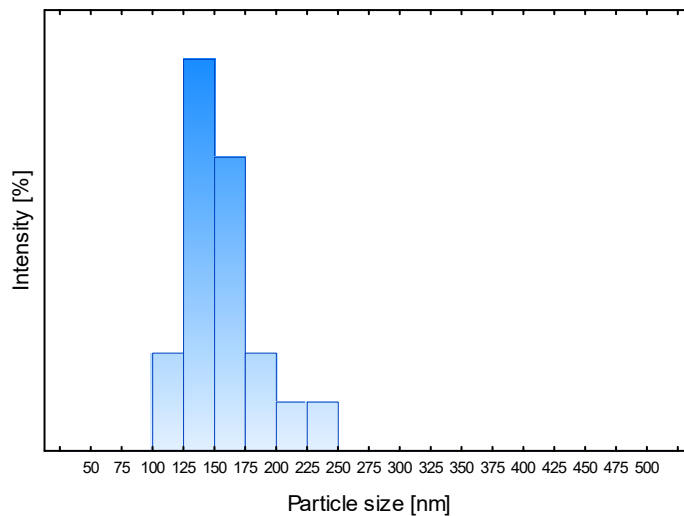

**Figure S15.** Particle size distribution of grinded silica carrier with chloramphenicol **D\_CIPh**

**Table S3.** Statistical summary of particle size measurements for silica materials **A\_CIPh** and **D\_CIPh** obtained using the dynamic light scattering (DLS) method

| Material | Mean  | Std.Dev. | RSD   | Minimum | Median | Maximum |
|----------|-------|----------|-------|---------|--------|---------|
| A_CIPh   | 178.2 | 22.14    | 12.0% | 141.8   | 182.2  | 241.2   |
| D_CIPh   | 156.3 | 32.3     | 20.7% | 100.3   | 151.8  | 229.1   |

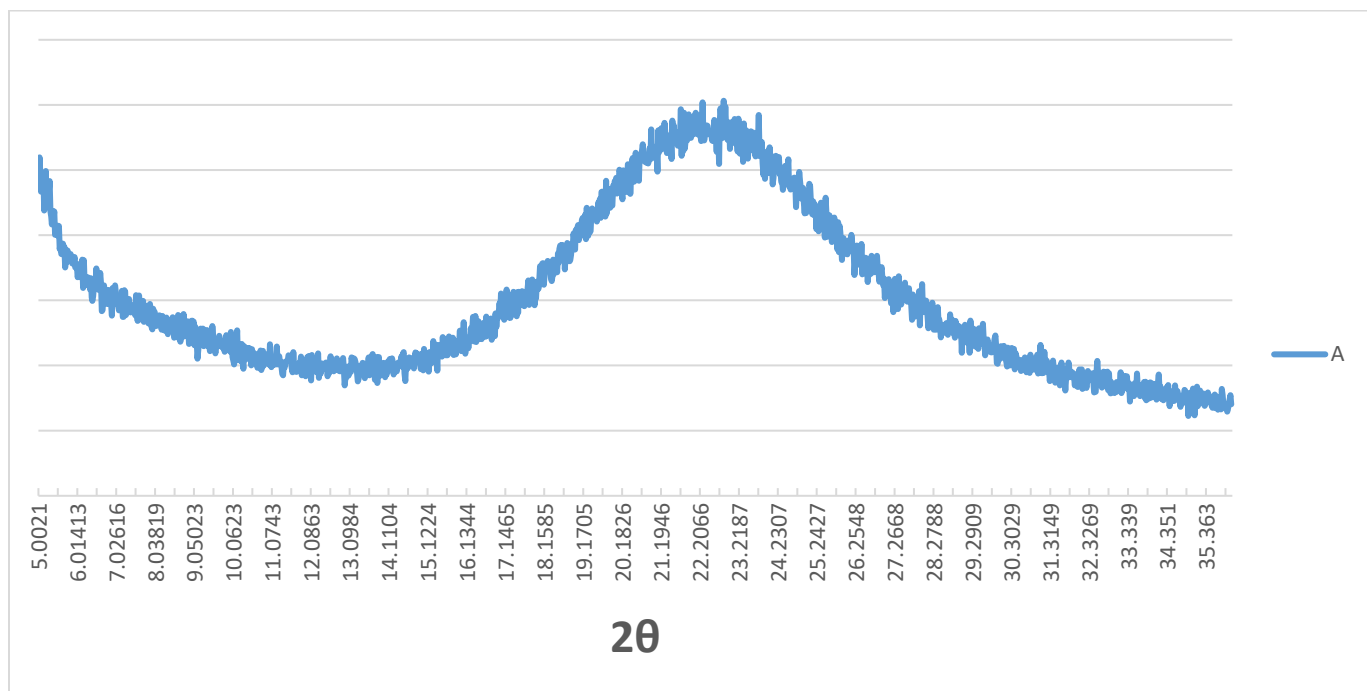

**Figure S16.** XRD pattern of silica carrier A

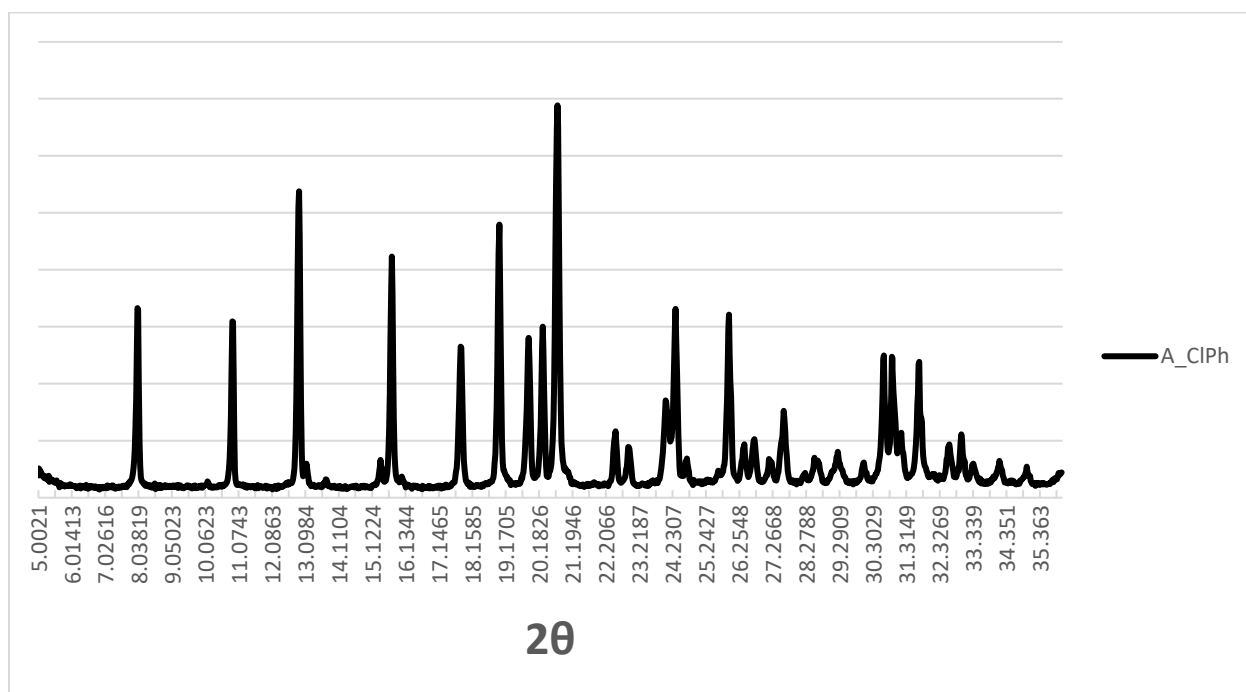

**Figure S17.** XRD pattern of silica carrier with chloramphenicol A\_CIPh

## Supplementary Materials

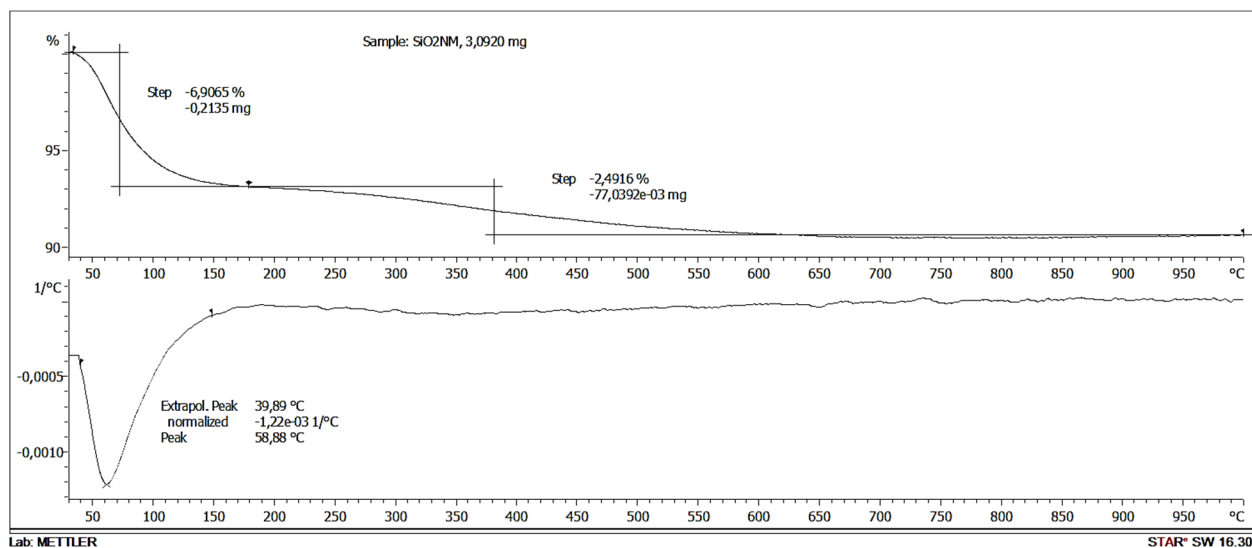

**Figure S18.** TGA curves of silica carrier A

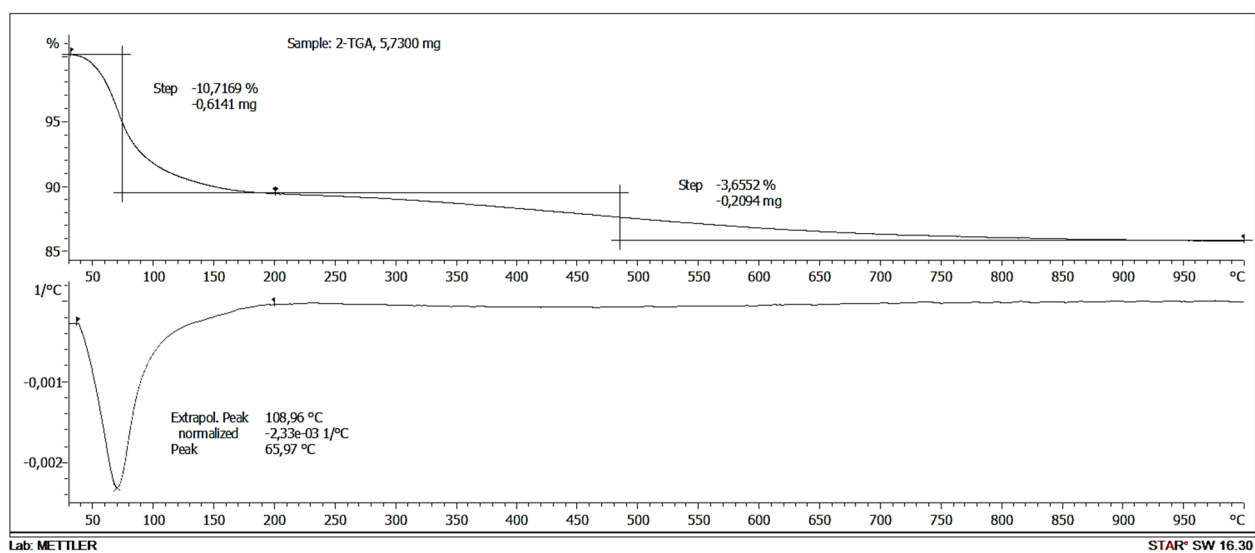

**Figure S19.** TGA curves of silica carrier B

## Supplementary Materials

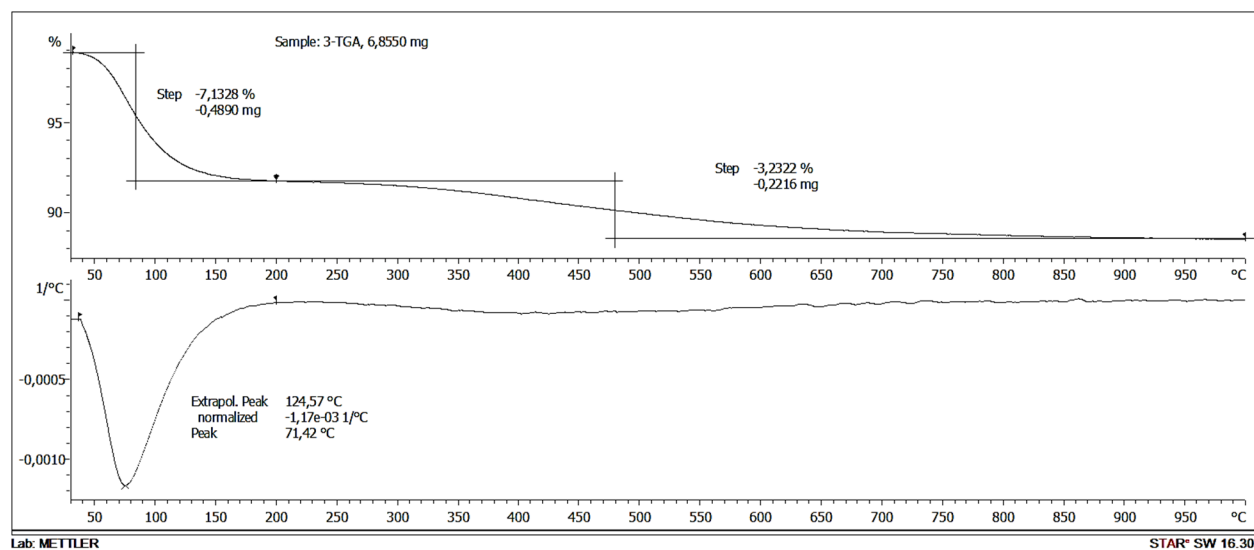

**Figure S20.** TGA curves of silica carrier C

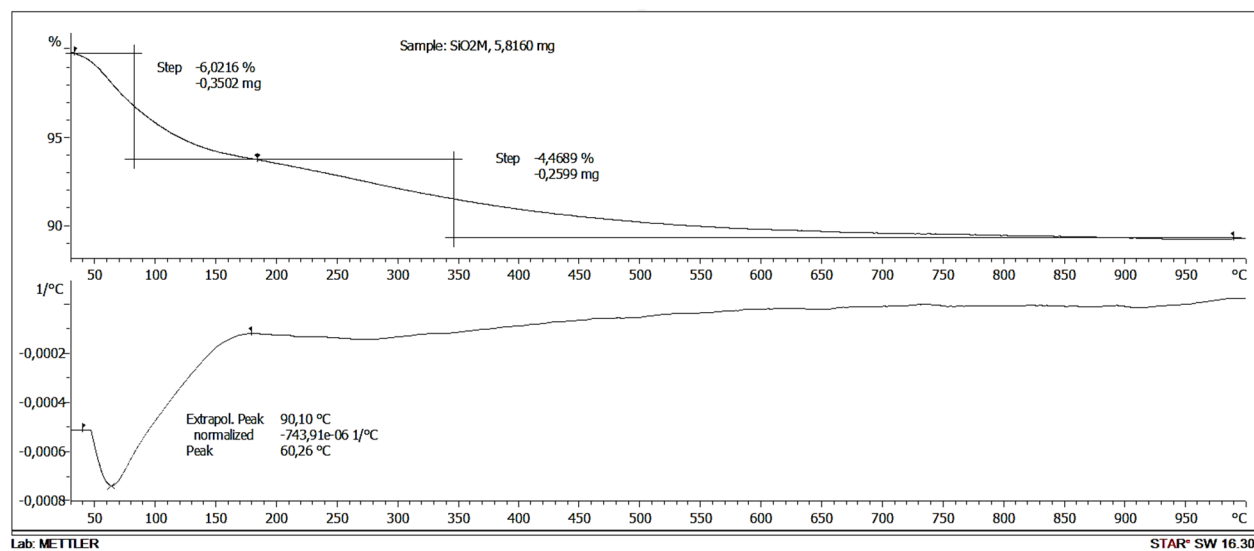

**Figure S21.** TGA curves of grinded silica carrier D

## Supplementary Materials

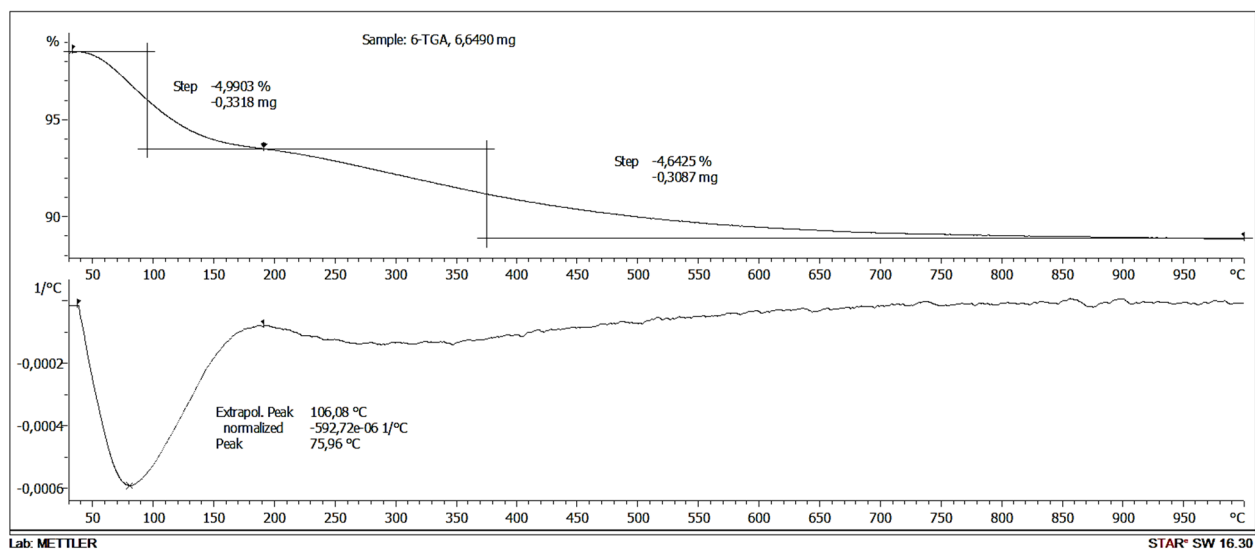

**Figure S22.** TGA curves of grinded silica carrier E

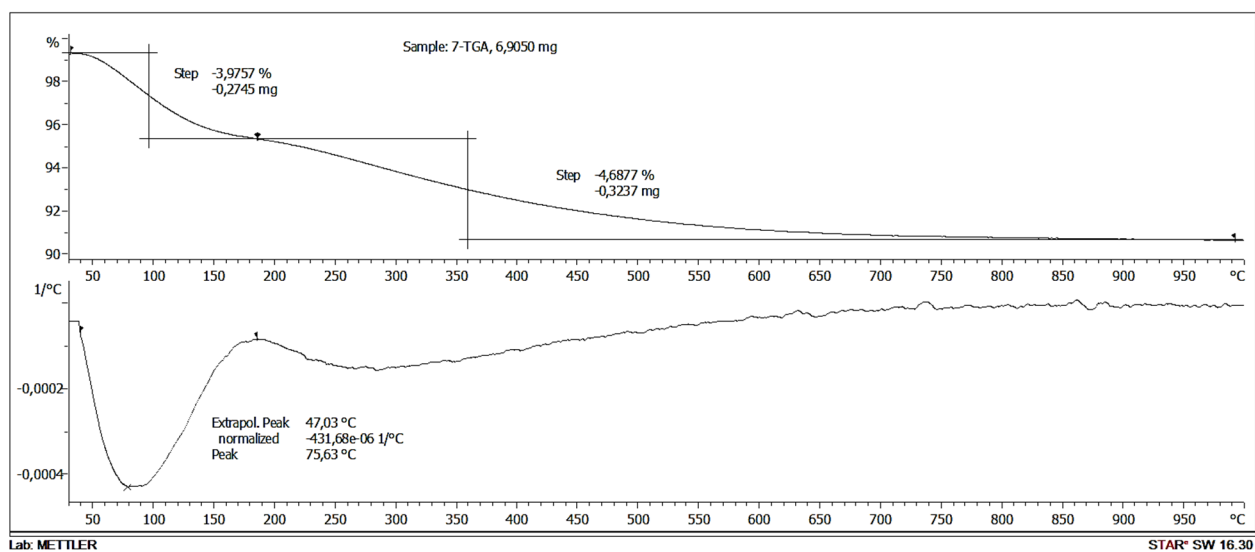

**Figure S23.** TGA curves of silica carrier F

## Supplementary Materials

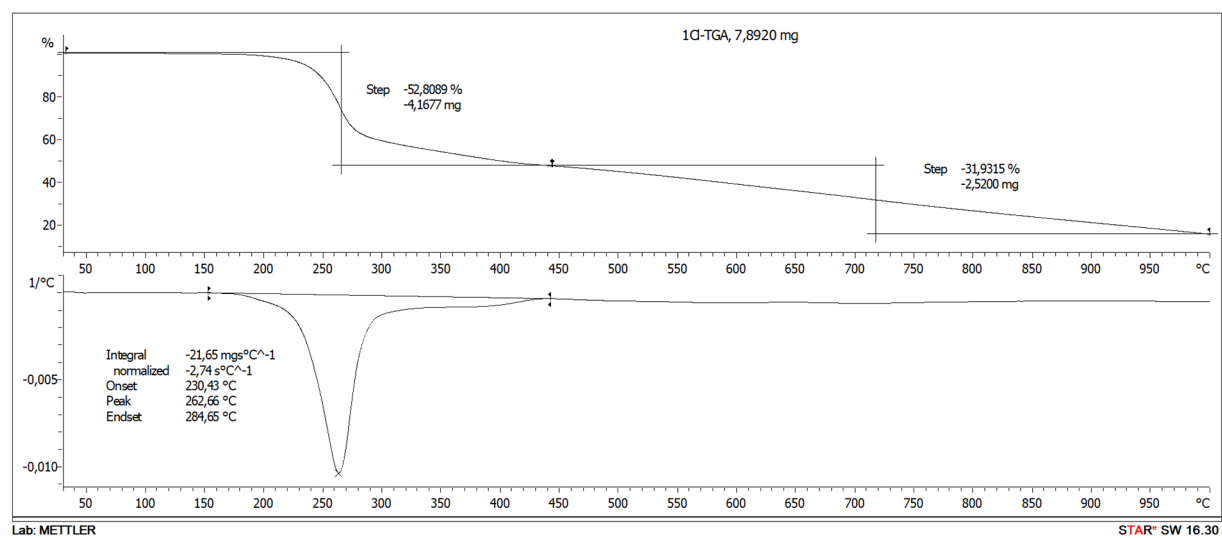

**Figure S24.** TGA curves of silica carrier with chloramphenicol A\_CIPh

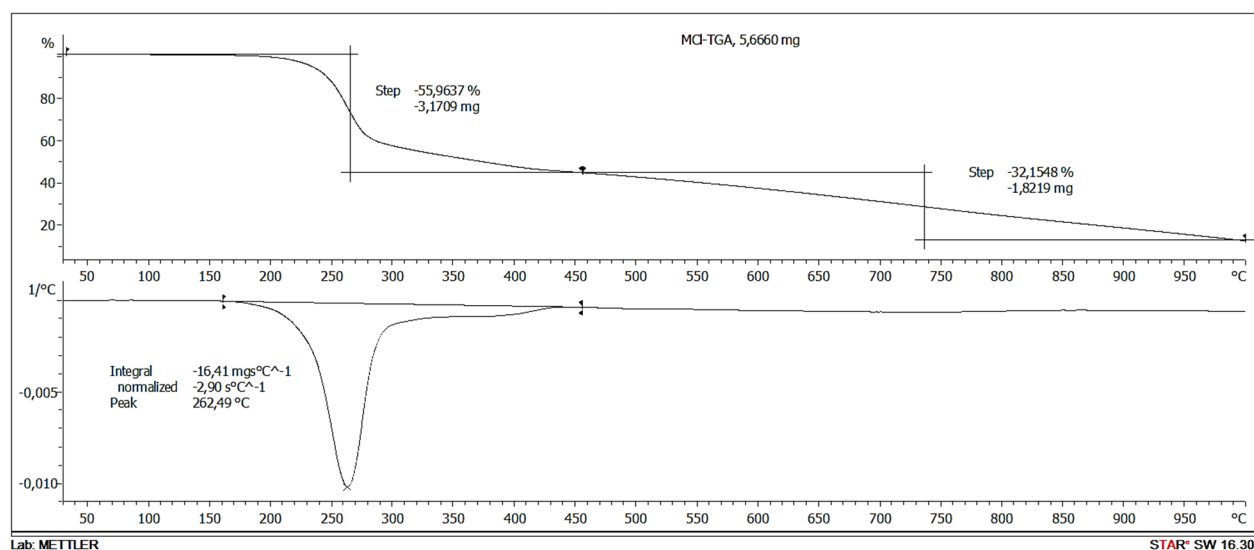

**Figure S25.** TGA curves of grinded silica carrier with chloramphenicol D\_CIPh

## Supplementary Materials

### Section 2: Dissolution study of chloramphenicol from carbopol-based gels

The study was performed using immersion chambers according to the USP1724 monograph. The initial volume of acceptor fluid was 100 ml. At selected time points, the autosampler sampled a solution volume of 2 ml from each chamber and 0.5 ml for rinsing the sampling needles. The medium was not replenished after subsequent time points and the loss of acceptor at subsequent time points was taken into account.

**Table S4.** Volume of acceptor fluid during release testing

| No. | time [min.] | Volume [ml] |
|-----|-------------|-------------|
| 1   | 5           | 100         |
| 2   | 10          | 97.5        |
| 3   | 15          | 95          |
| 4   | 30          | 92.5        |
| 5   | 60          | 90          |
| 6   | 120         | 87.5        |
| 7   | 240         | 85          |
| 8   | 360         | 82.5        |

Samples of the acceptor solution collected by autosampler were analyzed spectrophotometrically at  $\lambda = 278$  nm.

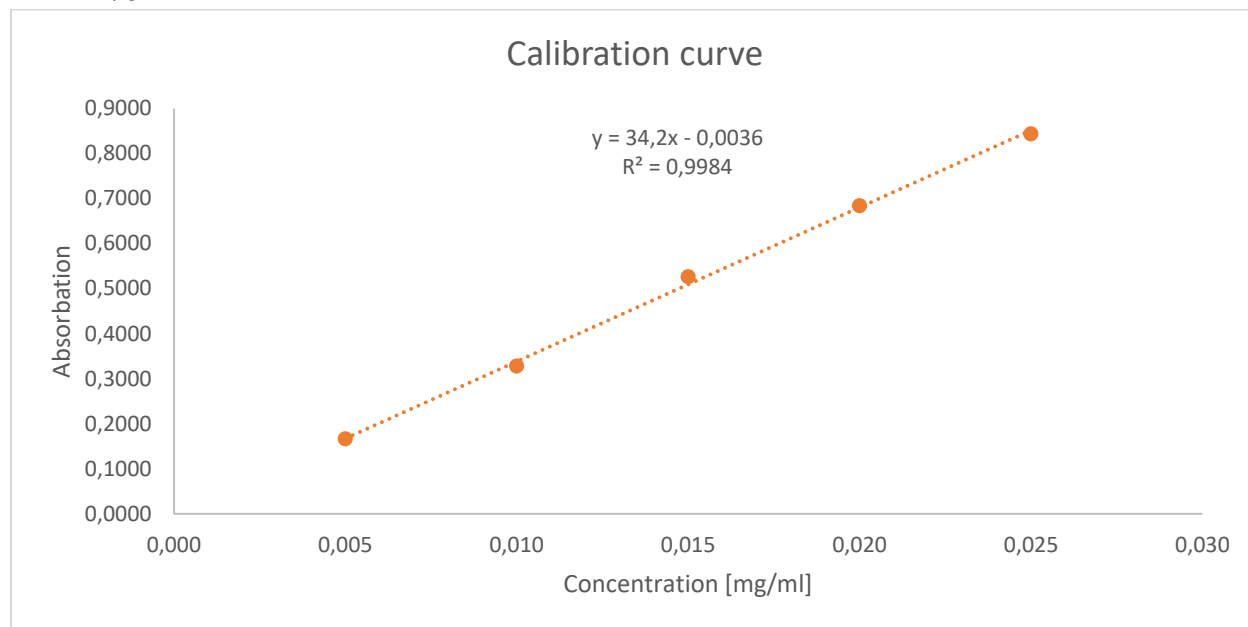

**Figure S26.** Calibration curve for chloramphenicol at 278 nm

The amount of active ingredient in the sample weight for each test unit was calculated based on the previously determined active ingredient content of the gel. The amount of released active substance in acceptor fluid Q1 was calculated for each unit (1-6) and each time point (1-8).

## Supplementary Materials

Then, the content of active substance in the solution taken for quantitative analysis was calculated Q2 after each timepoint.

**Table S5.** Weights of pure chloramphenicol gel without silica nanoparticles (BN) and calculated total contents BN.

| Unit                             | 1       | 2     | 3     | 4     | 5     | 6     |
|----------------------------------|---------|-------|-------|-------|-------|-------|
| concentration [mg/100g]          | 492.637 |       |       |       |       |       |
| Weight of sample [g]             | 0.672   | 0.648 | 0.682 | 0.680 | 0.646 | 0.644 |
| amount of active ingredient [mg] | 3.311   | 3.192 | 3.360 | 3.350 | 3.182 | 3.173 |

**Table S6.** Weights chloramphenicol gel with grinded silica nanoparticles and calculated total contents D\_CIPh.

| Unit                             | 1        | 2     | 3     | 4     | 5     | 6     |
|----------------------------------|----------|-------|-------|-------|-------|-------|
| concentration [mg/100g]          | 502.3665 |       |       |       |       |       |
| Weight of sample [g]             | 0.635    | 0.624 | 0.645 | 0.651 | 0.654 | 0.670 |
| amount of active ingredient [mg] | 3.190    | 3.285 | 3.240 | 3.270 | 3.135 | 3.366 |

**Table S7.** Weights of chloramphenicol gel with silica nanoparticles and calculated total contents A\_CIPh.

| Unit                             | 1       | 2     | 3     | 4     | 5     | 6     |
|----------------------------------|---------|-------|-------|-------|-------|-------|
| concentration [mg/100g]          | 528.857 |       |       |       |       |       |
| Weight of sample [g]             | 0.591   | 0.570 | 0.560 | 0.545 | 0.574 | 0.550 |
| amount of active ingredient [mg] | 3.126   | 3.014 | 2.962 | 2.882 | 3.036 | 2.909 |

**Table S8.** Calculated amount of chloramphenicol in the dissolution vessel after time, from formulation without silica nanoparticles BN.

| No. of time point | Q1_unit 1 [mg] | Q1_unit 2 [mg] | Q1_unit 3 [mg] | Q1_unit 4 [mg] | Q1_unit 5 [mg] | Q1_unit 6 [mg] |
|-------------------|----------------|----------------|----------------|----------------|----------------|----------------|
| 1                 | 0.1863         | 0.2243         | 0.7641         | 0.6042         | 0.3641         | 0.3091         |
| 2                 | 0.3074         | 0.2969         | 0.5990         | 0.5449         | 0.4865         | 0.4001         |
| 3                 | 0.4098         | 0.3822         | 0.7054         | 0.5904         | 0.4573         | 0.4626         |
| 4                 | 0.6157         | 0.5863         | 0.7690         | 0.7853         | 0.6520         | 0.6640         |
| 5                 | 0.9185         | 0.8560         | 1.0066         | 0.9938         | 0.9908         | 0.9027         |
| 6                 | 1.2222         | 1.2249         | 1.2841         | 1.3570         | 1.3224         | 1.3314         |
| 7                 | 1.6989         | 1.6530         | 1.5016         | 1.7238         | 1.7472         | 1.7063         |
| 8                 | 1.9629         | 1.8789         | 1.9670         | 1.9904         | 1.9879         | 1.9286         |

## Supplementary Materials

**Table S9.** Calculated amount of chloramphenicol in the dissolution vessel after time, from formulation with grinded silica nanoparticles **D\_CIPh**.

| No. of time point | Q1_unit 1 [mg] | Q1_unit 2 [mg] | Q1_unit 3 [mg] | Q1_unit 4 [mg] | Q1_unit 5 [mg] | Q1_unit 6 [mg] |
|-------------------|----------------|----------------|----------------|----------------|----------------|----------------|
| 1                 | 0.6625         | 0.7027         | 0.5888         | 0.4746         | 0.3388         | 0.4619         |
| 2                 | 0.7510         | 0.8127         | 0.7555         | 0.6400         | 0.4886         | 0.8581         |
| 3                 | 0.8012         | 0.9452         | 0.8763         | 0.9496         | 0.9077         | 0.9012         |
| 4                 | 1.1028         | 1.0865         | 1.1102         | 1.3118         | 1.2193         | 1.1859         |
| 5                 | 1.3769         | 1.2955         | 1.4491         | 1.4424         | 1.5002         | 1.5202         |
| 6                 | 1.8105         | 1.8007         | 1.8121         | 1.9058         | 1.8753         | 1.8210         |
| 7                 | 2.3399         | 2.3532         | 2.2703         | 2.4789         | 2.3128         | 2.3496         |
| 8                 | 2.4745         | 2.5575         | 2.4470         | 2.6787         | 2.5866         | 2.6963         |

**Table S10.** Calculated amount of chloramphenicol in the dissolution vessel after time, from formulation with silica nanoparticles **A\_CIPh**.

| No. of time point | Q1_unit 1 [mg] | Q1_unit 2 [mg] | Q1_unit 3 [mg] | Q1_unit 4 [mg] | Q1_unit 5 [mg] | Q1_unit 6 [mg] |
|-------------------|----------------|----------------|----------------|----------------|----------------|----------------|
| 1                 | 0.0873         | 0.1023         | 0.1314         | 0.1526         | 0.1906         | 0.1379         |
| 2                 | 0.1951         | 0.2825         | 0.2595         | 0.3202         | 0.2382         | 0.3462         |
| 3                 | 0.3204         | 0.3883         | 0.3578         | 0.4741         | 0.4458         | 0.3396         |
| 4                 | 0.6378         | 0.6555         | 0.6315         | 0.7134         | 0.7387         | 0.5942         |
| 5                 | 0.9659         | 1.0774         | 1.0497         | 1.0884         | 1.1485         | 1.0149         |
| 6                 | 1.5026         | 1.5990         | 1.6115         | 1.5912         | 1.6477         | 1.5601         |
| 7                 | 2.1629         | 2.2114         | 2.2411         | 2.1978         | 2.3986         | 2.2803         |
| 8                 | 2.5459         | 2.5067         | 2.6441         | 2.4838         | 2.7290         | 2.5820         |

**Table S11.** Calculated amounts of chloramphenicol that left the vessel after a given time point from formulation without silica nanoparticles BN.

| No. of time point | Σ Q2_unit 1 [mg] | Σ Q2_unit 2 [mg] | Σ Q2_unit 3 [mg] | Σ Q2_unit 4 [mg] | Σ Q2_unit 5 [mg] | Σ Q2_unit 6 [mg] |
|-------------------|------------------|------------------|------------------|------------------|------------------|------------------|
| 1                 | 0.0047           | 0.0056           | 0.0191           | 0.0151           | 0.0091           | 0.0077           |
| 2                 | 0.0125           | 0.0132           | 0.0345           | 0.0291           | 0.0216           | 0.0180           |
| 3                 | 0.0233           | 0.0233           | 0.0530           | 0.0446           | 0.0336           | 0.0302           |
| 4                 | 0.0400           | 0.0391           | 0.0738           | 0.0658           | 0.0512           | 0.0481           |
| 5                 | 0.0655           | 0.0629           | 0.1018           | 0.0934           | 0.0788           | 0.0732           |
| 6                 | 0.1004           | 0.0979           | 0.1385           | 0.1322           | 0.1165           | 0.1112           |
| 7                 | 0.1504           | 0.1465           | 0.1826           | 0.1829           | 0.1679           | 0.1614           |

## Supplementary Materials

**Table S12.** Calculated amounts of chloramphenicol that left the vessel after a given time point from formulation with grinded silica nanoparticles **D\_CIPh**.

| No. of time point | $\Sigma$ Q2_unit 1 [mg] | $\Sigma$ Q2_unit 2 [mg] | $\Sigma$ Q2_unit 3 [mg] | $\Sigma$ Q2_unit 4 [mg] | $\Sigma$ Q2_unit 5 [mg] | $\Sigma$ Q2_unit 6 [mg] |
|-------------------|-------------------------|-------------------------|-------------------------|-------------------------|-------------------------|-------------------------|
| 1                 | 0.0166                  | 0.0176                  | 0.0147                  | 0.0119                  | 0.0085                  | 0.0115                  |
| 2                 | 0.0358                  | 0.0384                  | 0.0341                  | 0.0283                  | 0.0210                  | 0.0336                  |
| 3                 | 0.0569                  | 0.0633                  | 0.0572                  | 0.0533                  | 0.0449                  | 0.0573                  |
| 4                 | 0.0867                  | 0.0926                  | 0.0872                  | 0.0887                  | 0.0778                  | 0.0893                  |
| 5                 | 0.1250                  | 0.1286                  | 0.1274                  | 0.1288                  | 0.1195                  | 0.1315                  |
| 6                 | 0.1767                  | 0.1801                  | 0.1792                  | 0.1832                  | 0.1731                  | 0.1836                  |
| 7                 | 0.2455                  | 0.2493                  | 0.2460                  | 0.2561                  | 0.2411                  | 0.2527                  |

**Table S13.** Calculated amounts of chloramphenicol that left the vessel after a given time point from formulation with silica nanoparticles **A\_CIPh**.

| No. of time point | $\Sigma$ Q2_unit 1 [mg] | $\Sigma$ Q2_unit 2 [mg] | $\Sigma$ Q2_unit 3 [mg] | $\Sigma$ Q2_unit 4 [mg] | $\Sigma$ Q2_unit 5 [mg] | $\Sigma$ Q2_unit 6 [mg] |
|-------------------|-------------------------|-------------------------|-------------------------|-------------------------|-------------------------|-------------------------|
| 1                 | 0.0022                  | 0.0026                  | 0.0033                  | 0.0038                  | 0.0048                  | 0.0034                  |
| 2                 | 0.0072                  | 0.0098                  | 0.0099                  | 0.0120                  | 0.0109                  | 0.0123                  |
| 3                 | 0.0156                  | 0.0200                  | 0.0194                  | 0.0245                  | 0.0226                  | 0.0213                  |
| 4                 | 0.0329                  | 0.0377                  | 0.0364                  | 0.0438                  | 0.0426                  | 0.0373                  |
| 5                 | 0.0597                  | 0.0677                  | 0.0656                  | 0.0740                  | 0.0745                  | 0.0655                  |
| 6                 | 0.1026                  | 0.1133                  | 0.1116                  | 0.1195                  | 0.1215                  | 0.1101                  |
| 7                 | 0.1662                  | 0.1784                  | 0.1775                  | 0.1841                  | 0.1921                  | 0.1772                  |

The cumulative value of the released active substance was then calculated according to the following formula.

$$Q_{i,n} [mg] = Qa_{i,n} + \sum_{1}^{i-1} Qb_{i,n}$$

Where  $i$  means the following time point and  $n$  means the vessel unit number.

## Supplementary Materials

**Table S14.** The cumulative amount of the released chloramphenicol from formulation without silica nanoparticles BN.

| No. of time point | (Q1+ΣQ2)_unit 1 [mg] | (Q1+ΣQ2)_unit 2 [mg] | (Q1+ΣQ2)_unit 3 [mg] | (Q1+ΣQ2)_unit 4 [mg] | (Q1+ΣQ2)_unit 5 [mg] | (Q1+ΣQ2)_unit 6 [mg] |
|-------------------|----------------------|----------------------|----------------------|----------------------|----------------------|----------------------|
| 1                 | 0.1863               | 0.2243               | 0.7641               | 0.6042               | 0.3641               | 0.3091               |
| 2                 | 0.3121               | 0.3025               | 0.6181               | 0.5600               | 0.4956               | 0.4078               |
| 3                 | 0.4223               | 0.3954               | 0.7398               | 0.6195               | 0.4789               | 0.4806               |
| 4                 | 0.6390               | 0.6096               | 0.8221               | 0.8299               | 0.6856               | 0.6941               |
| 5                 | 0.9585               | 0.8952               | 1.0804               | 1.0597               | 1.0420               | 0.9508               |
| 6                 | 1.2877               | 1.2878               | 1.3859               | 1.4505               | 1.4012               | 1.4045               |
| 7                 | 1.7993               | 1.7509               | 1.6401               | 1.8561               | 1.8637               | 1.8175               |
| 8                 | 2.1133               | 2.0254               | 2.1496               | 2.1733               | 2.1558               | 2.0900               |

**Table S15.** The cumulative amount of the released chloramphenicol from formulation with grinded silica nanoparticles D\_CIPh.

| No. of time point | (Q1+ΣQ2)_unit 1 [mg] | (Q1+ΣQ2)_unit 2 [mg] | (Q1+ΣQ2)_unit 3 [mg] | (Q1+ΣQ2)_unit 4 [mg] | (Q1+ΣQ2)_unit 5 [mg] | (Q1+ΣQ2)_unit 6 [mg] |
|-------------------|----------------------|----------------------|----------------------|----------------------|----------------------|----------------------|
| 1                 | 0.6625               | 0.7027               | 0.5888               | 0.4746               | 0.3388               | 0.4619               |
| 2                 | 0.7676               | 0.8303               | 0.7702               | 0.6518               | 0.4971               | 0.8697               |
| 3                 | 0.8371               | 0.9836               | 0.9104               | 0.9779               | 0.9287               | 0.9348               |
| 4                 | 1.1597               | 1.1498               | 1.1674               | 1.3650               | 1.2642               | 1.2431               |
| 5                 | 1.4636               | 1.3881               | 1.5363               | 1.5312               | 1.5781               | 1.6096               |
| 6                 | 1.9354               | 1.9294               | 1.9395               | 2.0346               | 1.9948               | 1.9525               |
| 7                 | 2.5166               | 2.5333               | 2.4495               | 2.6622               | 2.4859               | 2.5332               |
| 8                 | 2.7200               | 2.8068               | 2.6930               | 2.9349               | 2.8277               | 2.9490               |

**Table S16.** The cumulative amount of the released chloramphenicol from formulation with silica nanoparticles A\_CIPh.

| No. of time point | (Q1+ΣQ2)_unit 1 [mg] | (Q1+ΣQ2)_unit 2 [mg] | (Q1+ΣQ2)_unit 3 [mg] | (Q1+ΣQ2)_unit 4 [mg] | (Q1+ΣQ2)_unit 5 [mg] | (Q1+ΣQ2)_unit 6 [mg] |
|-------------------|----------------------|----------------------|----------------------|----------------------|----------------------|----------------------|
| 1                 | 0.0873               | 0.1023               | 0.1314               | 0.1526               | 0.1906               | 0.1379               |
| 2                 | 0.1973               | 0.2851               | 0.2628               | 0.3240               | 0.2429               | 0.3496               |
| 3                 | 0.3276               | 0.3981               | 0.3677               | 0.4861               | 0.4567               | 0.3519               |
| 4                 | 0.6534               | 0.6756               | 0.6509               | 0.7379               | 0.7613               | 0.6154               |
| 5                 | 0.9988               | 1.1151               | 1.0861               | 1.1322               | 1.1910               | 1.0522               |
| 6                 | 1.5623               | 1.6666               | 1.6771               | 1.6652               | 1.7222               | 1.6256               |
| 7                 | 2.2655               | 2.3248               | 2.3527               | 2.3172               | 2.5202               | 2.3904               |
| 8                 | 2.7121               | 2.6851               | 2.8216               | 2.6679               | 2.9211               | 2.7592               |

## Supplementary Materials

The percentage released active substance is calculated as ratio of the amount realeased and the total amount of active substance in each vessel unit. Mean value and the standard deviation of each time point is presented in the following table.

**Table S17.** Released percent of active substance after each time point for all tested formulations.

| Formulation |            | BN       |       | D_CIPh   |       | A_CIPh   |       |
|-------------|------------|----------|-------|----------|-------|----------|-------|
| No          | time [min] | mean [%] | SD    | mean [%] | SD    | mean [%] | SD    |
| 0           | 0          | 0        | -     | 0        | -     | 0        | -     |
| 1           | 5          | 12.436   | 6.655 | 16.561   | 4.218 | 4.490    | 1.264 |
| 2           | 10         | 13.741   | 3.781 | 22.455   | 3.837 | 9.318    | 2.097 |
| 3           | 15         | 15.975   | 3.678 | 28.596   | 1.486 | 13.352   | 2.277 |
| 4           | 30         | 21.844   | 2.432 | 37.730   | 2.673 | 22.856   | 2.007 |
| 5           | 60         | 30.582   | 1.883 | 46.754   | 2.664 | 36.719   | 2.682 |
| 6           | 120        | 42.014   | 2.186 | 60.518   | 2.124 | 55.382   | 2.775 |
| 7           | 240        | 54.879   | 3.367 | 77.926   | 2.371 | 79.107   | 3.856 |
| 8           | 360        | 64.960   | 1.618 | 86.894   | 2.782 | 92.462   | 3.787 |

## Supplementary Materials

### Section 3: Model dependent analysis

#### First-order kinetics model

According to the first-order kinetics model, we determine a straight line that is the time dependence of the logarithm of the percent residue of the drug substance. Percent residue was determined from the equation  $PP[\%] = 100 - Q\%$ , then the values were logarithmized. Process parameters were determined in the form of a constant release rate  $k$  calculated as the slope of the straight line of the logarithm of the percentage of residue versus time.

**Table S18.** First-order kinetics model calculation

| No. | Time [min] | BN     |         | D_CIPh |         | A_CIPh |         |
|-----|------------|--------|---------|--------|---------|--------|---------|
|     |            | PP [%] | ln (PP) | PP [%] | ln (PP) | PP [%] | ln (PP) |
| 1   | 5          | 87.564 | 4.4724  | 83.439 | 4.4241  | 95.510 | 4.5592  |
| 2   | 10         | 86.259 | 4.4574  | 77.545 | 4.3509  | 90.682 | 4.5074  |
| 3   | 15         | 84.025 | 4.4311  | 71.404 | 4.2684  | 86.648 | 4.4618  |
| 4   | 30         | 78.156 | 4.3587  | 62.270 | 4.1315  | 77.144 | 4.3457  |
| 5   | 60         | 69.418 | 4.2401  | 53.246 | 3.9749  | 63.281 | 4.1476  |
| 6   | 120        | 57.986 | 4.0602  | 39.482 | 3.6758  | 44.618 | 3.7981  |
| 7   | 240        | 45.121 | 3.8094  | 22.074 | 3.0944  | 20.893 | 3.0394  |
| 8   | 360        | 35.040 | 3.5565  | 13.106 | 2.5731  | 7.538  | 2.0200  |

**Table S19.** First-order kinetics model parameters.

| Parameter          | BN      | D_CIPh  | A_CIPh  |
|--------------------|---------|---------|---------|
| $k$ [%/min] =      | 0.0026  | 0.0051  | 0.0069  |
| $t_{50\%}$ [min] = | 268.630 | 136.695 | 100.465 |
| $PP_0$ [%] =       | 85.128  | 77.019  | 97.940  |
| $R^2$ =            | 0.983   | 0.990   | 0.996   |

## Supplementary Materials

### Zero order kinetics Model

According to zero-order kinetics, there is a linear dependence of both the percent released and the percent residual on time.

**Table S20.** Calculation of zero order kinetics

| No. | Time [min] | BN<br>PP [%] | D_CIPh<br>PP [%] | A_CIPh<br>PP [%] |
|-----|------------|--------------|------------------|------------------|
| 1   | 5          | 87.564       | 83.439           | 95.510           |
| 2   | 10         | 86.259       | 77.545           | 90.682           |
| 3   | 15         | 84.025       | 71.404           | 86.648           |
| 4   | 30         | 78.156       | 62.270           | 77.144           |
| 5   | 60         | 69.418       | 53.246           | 63.281           |
| 6   | 120        | 57.986       | 39.482           | 44.618           |
| 7   | 240        | 45.121       | 22.074           | 20.893           |
| 8   | 360        | 35.040       | 13.106           | 7.538            |

**Table S21.** Zero-order kinetics parameters

| Parameter           | BN      | D_CIPh  | A_CIPh |
|---------------------|---------|---------|--------|
| $k_{0_T}$ [%/min] = | 0.14886 | 0.18849 | 0.2468 |
| $PP_0$ T [%] =      | 83.576  | 72.612  | 86.705 |
| $R^2$ =             | 0.940   | 0.897   | 0.932  |

## Supplementary Materials

### Higuchi's model

Higuchi's model is primarily used to describe the release of well and poorly soluble substances from matrix therapeutic systems, and is also used to describe the rate of penetration of an active substance through a membrane or skin. This model uses the dependence of the percent released on the square root of time.

**Table S22.** Higuchi model calculation.

| No | time [min] | $t^{0.5}$ [min <sup>0.5</sup> ] | BN<br>Q [%] | D_ClPh<br>Q [%] | A_ClPh<br>Q [%] |
|----|------------|---------------------------------|-------------|-----------------|-----------------|
| 1  | 5          | 2.236                           | 12.436      | 16.561          | 4.490           |
| 2  | 10         | 3.162                           | 13.741      | 22.455          | 9.318           |
| 3  | 15         | 3.873                           | 15.975      | 28.596          | 13.352          |
| 4  | 30         | 5.477                           | 21.844      | 37.730          | 22.856          |
| 5  | 60         | 7.746                           | 30.582      | 46.754          | 36.719          |
| 6  | 120        | 10.954                          | 42.014      | 60.518          | 55.382          |
| 7  | 240        | 15.492                          | 54.879      | 77.926          | 79.107          |
| 8  | 360        | 18.974                          | 64.960      | 86.894          | 92.462          |

**Table S23.** Higuchi model parameters

| Parameter | BN      | D_ClPh  | A_ClPh |
|-----------|---------|---------|--------|
| $a =$     | 3.24798 | 4.18411 | 5.4066 |
| $b =$     | 4.481   | 11.659  | -6.688 |
| $R^2 =$   | 0.997   | 0.985   | 0.996  |

## Supplementary Materials

### Hixson-Crowell model

Hixson-Crowell cube root law -describes the release from systems where there is a change in surface area and diameter of particles. To study the release kinetics, data obtained from in vitro drug release studies were plotted as cube root of drug percentage remaining in matrix versus time.

**Table S24.** Hixson-Crowell model calculation

| <i>Lp</i> | Time [min] | $(PP_T)^{1/3}$ | $(PP_T)^{1/3}$ | $(PP_R)^{1/3}$ |
|-----------|------------|----------------|----------------|----------------|
| 1         | 5          | 4.441          | 4.370          | 4.571          |
| 2         | 10         | 4.418          | 4.264          | 4.493          |
| 3         | 15         | 4.380          | 4.149          | 4.425          |
| 4         | 30         | 4.276          | 3.964          | 4.257          |
| 5         | 60         | 4.110          | 3.762          | 3.985          |
| 6         | 120        | 3.871          | 3.405          | 3.547          |
| 7         | 240        | 3.560          | 2.805          | 2.754          |
| 8         | 360        | 3.272          | 2.358          | 1.961          |

**Table S25.** Hixson-Crowell model parameters

| Parameter   | BN     | D_CIPh | A_CIPh |
|-------------|--------|--------|--------|
| $k_{r-T} =$ | 0.0033 | 0.0055 | 0.0072 |
| $R^2 =$     | 0.971  | 0.970  | 0.994  |

## Supplementary Materials

### Korsmeyer-Peppas model

Korsmeyer-Peppas model is a simple relationship which described drug release from a polymeric system equation. To study the release kinetics, data obtained from in vitro drug release studies were plotted as log cumulative percentage drug release versus log time.

**Table S26.** Korsmeyer-Peppas model calculation

| No. | time [min] | ln (t) | BN<br>ln (Qt <sub>SR</sub> ) | D_CIPh<br>ln (Qt <sub>SR</sub> ) | A_CIPh<br>ln (Qt <sub>SR</sub> ) |
|-----|------------|--------|------------------------------|----------------------------------|----------------------------------|
| 1   | 5          | 1.609  | 2.5206                       | 2.8071                           | 1.5018                           |
| 2   | 10         | 2.303  | 2.6204                       | 3.1115                           | 2.2319                           |
| 3   | 15         | 2.708  | 2.7711                       | 3.3533                           | 2.5917                           |
| 4   | 30         | 3.401  | 3.0839                       | 3.6304                           | 3.1292                           |
| 5   | 60         | 4.094  | 3.4204                       | 3.8449                           | 3.6033                           |
| 6   | 120        | 4.787  | 3.7380                       | 4.1029                           | 4.0143                           |
| 7   | 240        | 5.481  | 4.0051                       | 4.3558                           | 4.3708                           |
| 8   | 360        | 5.886  | 4.1738                       | 4.4647                           | 4.5268                           |

**Table S27.** Korsmeyer-Peppas model Parameters

|                         |        |        |        |
|-------------------------|--------|--------|--------|
| <i>n</i> =              | 0.4128 | 0.3838 | 0.6932 |
| ln ( <i>a</i> ) =       | 1.730  | 2.256  | 0.623  |
| <i>a</i> =              | 5.640  | 9.549  | 1.865  |
| <i>R</i> <sup>2</sup> = | 0.990  | 0.993  | 0.982  |

## Supplementary Materials

### Section 4: Model independent analysis

#### D.E. release efficiency

Based on the conducted pharmaceutical availability studies for each of the six units of the drug formulation belonging to the three compared formulations, the D.E. release efficiency was determined - a parameter independent of the adopted kinetic model. Basic descriptive statistics were first calculated for the three mean values of the parameter: deviation (SD) and standard error (SE), coefficient of variation (CV, RSD) and 95% significance interval for the mean (95%CI). The normality of their distributions was assessed by the Shapiro-Wilk W test. Levene's test was used to assess homogeneity of variance. All analyzed variables met the assumptions of both normality of distribution and homogeneity of variance. In the next stage the statistical significance of differences between the mean values of compared parameters was assessed using parametric analysis of variance AVOVA. For post-hoc multiple comparisons Fisher's NIR test of least significant difference was used. In all applied analyses and statistical tests, the significance level of  $\alpha=0.05$  was assumed.

**Table S28.** Analysis of Variance, variable: DE

| SS<br>Effect | df<br>Effect | MS<br>Effect | SS<br>Error | df<br>Error | MS<br>Error | F        | P        |
|--------------|--------------|--------------|-------------|-------------|-------------|----------|----------|
| 0.132840     | 2            | 0.066420     | 0.007693    | 15          | 0.000513    | 129.5104 | 0.000000 |

Marked effects are significant at  $p < .05000$ , variable: DE

**Table S29.** Levene Test of Homogeneity of Variances, variable: DE

| SS<br>Effect | df<br>Effect | MS<br>Effect | SS<br>Error | df<br>Error | MS<br>Error | F        | P        |
|--------------|--------------|--------------|-------------|-------------|-------------|----------|----------|
| 0.000173     | 2            | 0.000086     | 0.001855    | 15          | 0.000124    | 0.699202 | 0.512475 |

Marked effects are significant at  $p < .05000$ , variable: DE

## Supplementary Materials

**Table S30.** Breakdown descriptive statistics, variable: DE

| Parameter for variable: DE | Formulation |        |        | All Groups |
|----------------------------|-------------|--------|--------|------------|
|                            | BN          | D_CIPh | A_CIPh |            |
| Mean                       | 0.4562      | 0.6513 | 0.6221 | 0.5765     |
| Number                     | 6           | 6      | 6      | 18         |
| Std. Dev.                  | 0.0182      | 0.0184 | 0.0295 | 0.0909     |
| Std. Error                 | 0.0074      | 0.0075 | 0.0120 | 0.0214     |
| CV                         | 3.98%       | 2.83%  | 4.74%  | 15.77%     |
| Minimum                    | 0.4387      | 0.6356 | 0.5684 | 0.4387     |
| Maximum                    | 0.4805      | 0.6741 | 0.6498 | 0.6741     |
| Confidence level -0.95     | 0.4371      | 0.6319 | 0.5911 | 0.5313     |
| Confidence level +0.95     | 0.4752      | 0.6706 | 0.6530 | 0.6217     |

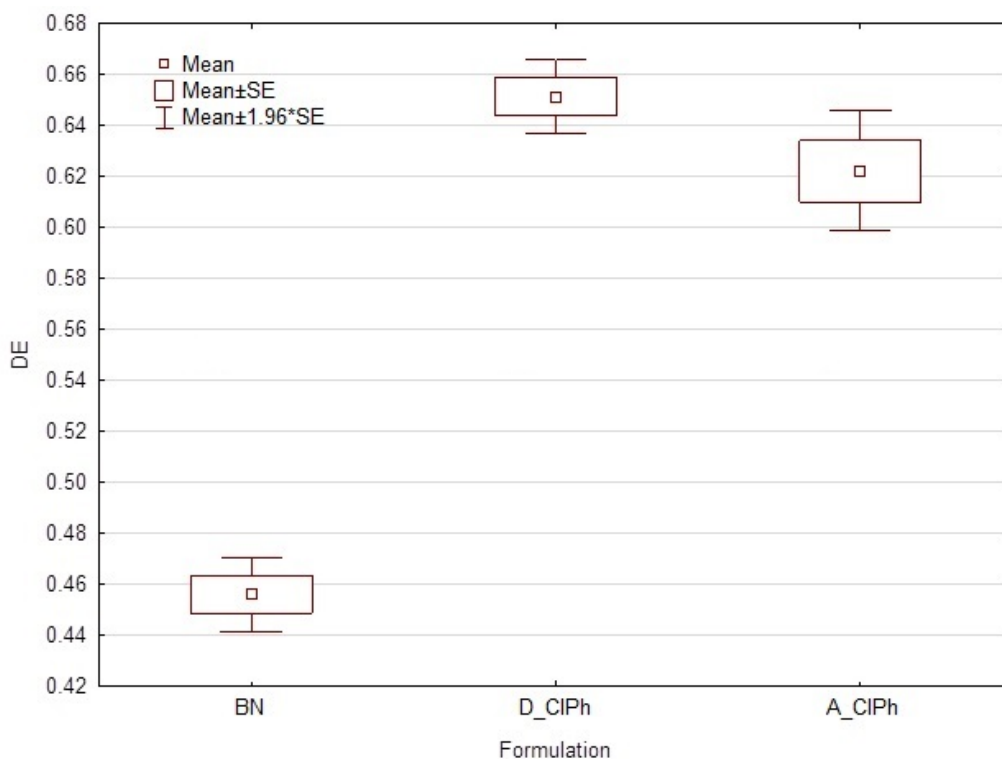

**Figure S27.** Categorized box whisker plot of dissolution efficiency.

## Supplementary Materials

**Table S31.** Fisher's Least significant difference test, variable: DE

| LSD Test; Variable: DE                             |                 |                 |                 |
|----------------------------------------------------|-----------------|-----------------|-----------------|
| Marked differences are significant at $p < .05000$ |                 |                 |                 |
| Formulation                                        | {1}<br>M=,45618 | {2}<br>M=,65126 | {3}<br>M=,54027 |
| BN {1}                                             | X               | 2.09E-10        | 2.01E-09        |
| D_CIPh {2}                                         | 2.09E-10        | X               | 4.12E-02        |
| A_CIPh {3}                                         | 2.01E-09        | 4.12E-02        | X               |

Marked differences are significant at  $p < .05000$ , variable: DE

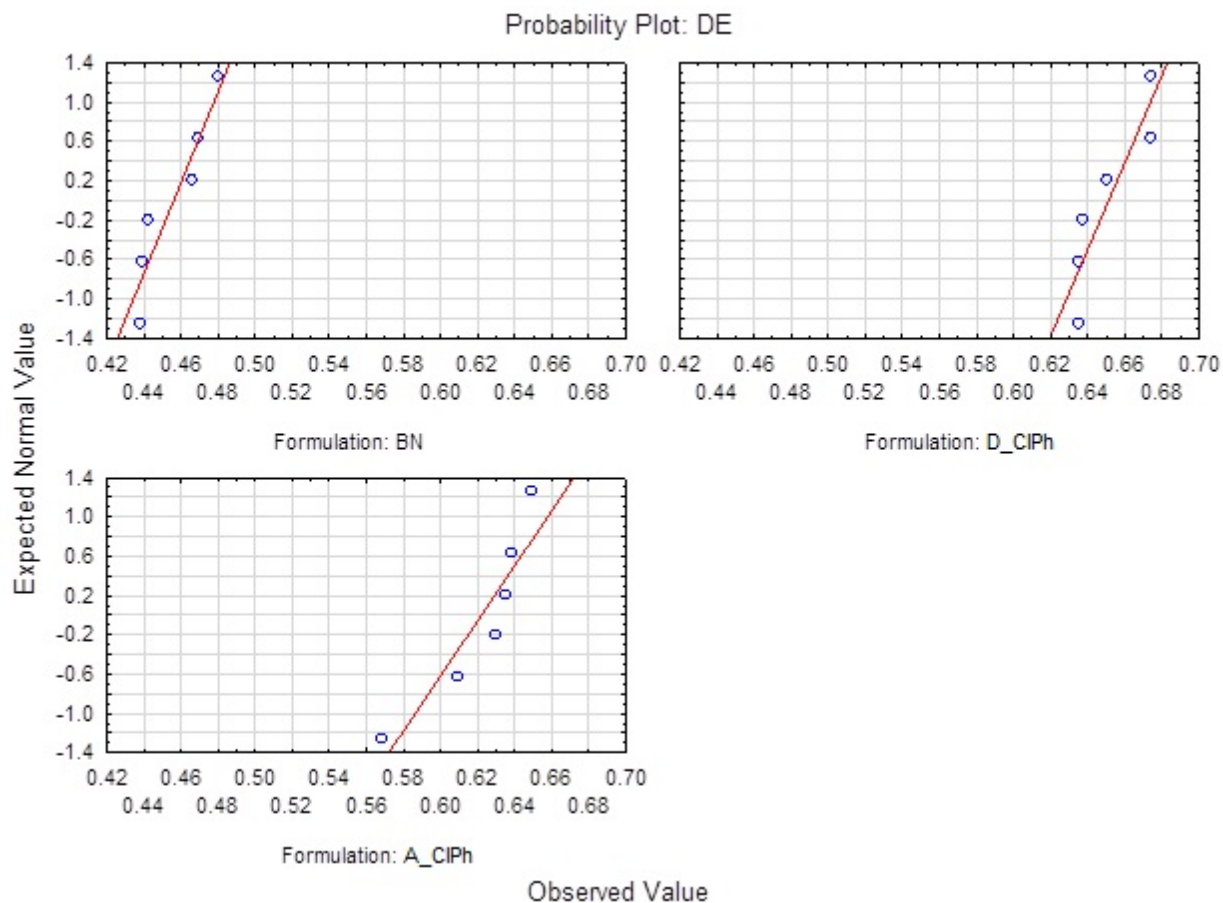

**Figure S28.** Probability plot, variable: DE

## Supplementary Materials

### MDT (Mean Dissolution Time)

Mean Dissolution Time MDT (Mean Dissolution Time) is equivalent to the first statistical moment MRT (Mean Drug Residence Time, Mean Residence Time). It is determined according to the following equation:

$$MDT = \frac{\sum_{i=1}^n \hat{t}_i \cdot \Delta M_i}{\sum_{i=1}^n \Delta M_i}, \quad \hat{t}_i = \frac{t_i + t_{i-1}}{2},$$

From the averaged value of the percent released and timepoints, the mean dissolution time (MDT) was calculated for each formulation as model-independent analysis. The analysis consists of determining the average time values between following time points including the zero point. The increment of the percent released relative to the previous one is then calculated. For each of the time points, the average time value is multiplied by the increment of the percent released. The results of the multiplication are summed and this value is divided by the value of the percent released at the last time point.

**Table S32.** Calculation of the Mean Dissolution time for each formulation

| ti*   | BN            |                 | D_CIPh        |                 | A_CIPh        |                  |
|-------|---------------|-----------------|---------------|-----------------|---------------|------------------|
|       | ΔMi           | ti* • ΔMi       | ΔMi           | ti* • ΔMi       | ΔMi           | ti* • ΔMi        |
| 2.5   | 12.436        | 31.089          | 16.561        | 41.404          | 4.490         | 11.224           |
| 7.5   | 1.305         | 9.787           | 5.894         | 44.202          | 4.828         | 36.211           |
| 12.5  | 2.235         | 27.933          | 6.141         | 76.761          | 4.035         | 50.434           |
| 22.5  | 5.868         | 132.034         | 9.134         | 205.508         | 9.503         | 213.828          |
| 45.0  | 8.739         | 393.245         | 9.024         | 406.093         | 13.863        | 623.824          |
| 90.0  | 11.432        | 1028.880        | 13.764        | 1238.786        | 18.663        | 1679.714         |
| 180.0 | 12.864        | 2315.544        | 17.408        | 3133.387        | 23.724        | 4270.398         |
| 300.0 | 10.081        | 3024.324        | 8.968         | 2690.499        | 13.355        | 4006.500         |
| Σ =   | <b>64.960</b> | <b>6962.837</b> | <b>86.894</b> | <b>7836.640</b> | <b>92.462</b> | <b>10892.132</b> |

ti – time points; ΔMi averaged value of the percent released

**Table S33.** Mean dissolution time (MDT) for tested formulations.

| Formulation | Mean dissolution time [min] |
|-------------|-----------------------------|
| BN          | 107.187                     |
| D_CIPh      | 90.186                      |
| A_CIPh      | 117.802                     |

## Section 5: Weibull Model

Nonlinear of release profiles were used model-dependent based on Weibull function.

The obtained three release profiles were described using the Weibull model recommended by FDA and EMA guidelines. The estimation of model parameters (k, b) was performed using the form of Weibull function defined according to the formula:

$$Qt = 100 * (1 - \text{Exp}(-k * t)^b)$$

minimizing the S least squares loss function defined as:

$$S = \sum (Obs - Pred)^2$$

The minimization procedure for the loss function S so defined was performed based on a nonlinear Quasi-Newton iterative algorithm. The nonlinear estimation procedure was carried out using random initial values of the parameter estimators k and b. The initial step length in the iterative procedure was set as 0.001 by adopting a convergence criterion of  $1 \times 10^{-6}$ .

The values of the estimated parameters in the fit are shown in the table below. Below is a graph showing the function run and the mean values of the percent released.

**Table S34.** Weibull function nonlinear estimation parameters

| Sample | Parameter | Estimate | Standard Error | t-Statistic | P-Value                      | Confidence Interval(-) | Confidence Interval(+) |
|--------|-----------|----------|----------------|-------------|------------------------------|------------------------|------------------------|
| BN     | k         | 0.00282  | 0.00016        | 18.115      | 1.82121<br>*10 <sup>-6</sup> | 0.00244                | 0.00320                |
| BN     | b         | 0.54563  | 0.02018        | 27.033      | 1.69271<br>*10 <sup>-7</sup> | 0.49624                | 0.59501                |
| D_ClPh | k         | 0.00834  | 0.00042        | 20.077      | 9.91565<br>*10 <sup>-7</sup> | 0.00732                | 0.00935                |
| D_ClPh | b         | 0.55761  | 0.02187        | 25.496      | 2.39898<br>*10 <sup>-7</sup> | 0.50409                | 0.61112                |
| A_ClPh | k         | 0.006992 | 0.000185       | 37.8444     | 2.27263<br>*10 <sup>-8</sup> | 0.00654                | 0.00654                |
| A_ClPh | b         | 0.896888 | 0.025522       | 35.1416     | 3.53872<br>*10 <sup>-8</sup> | 0.834438               | 0.834438               |

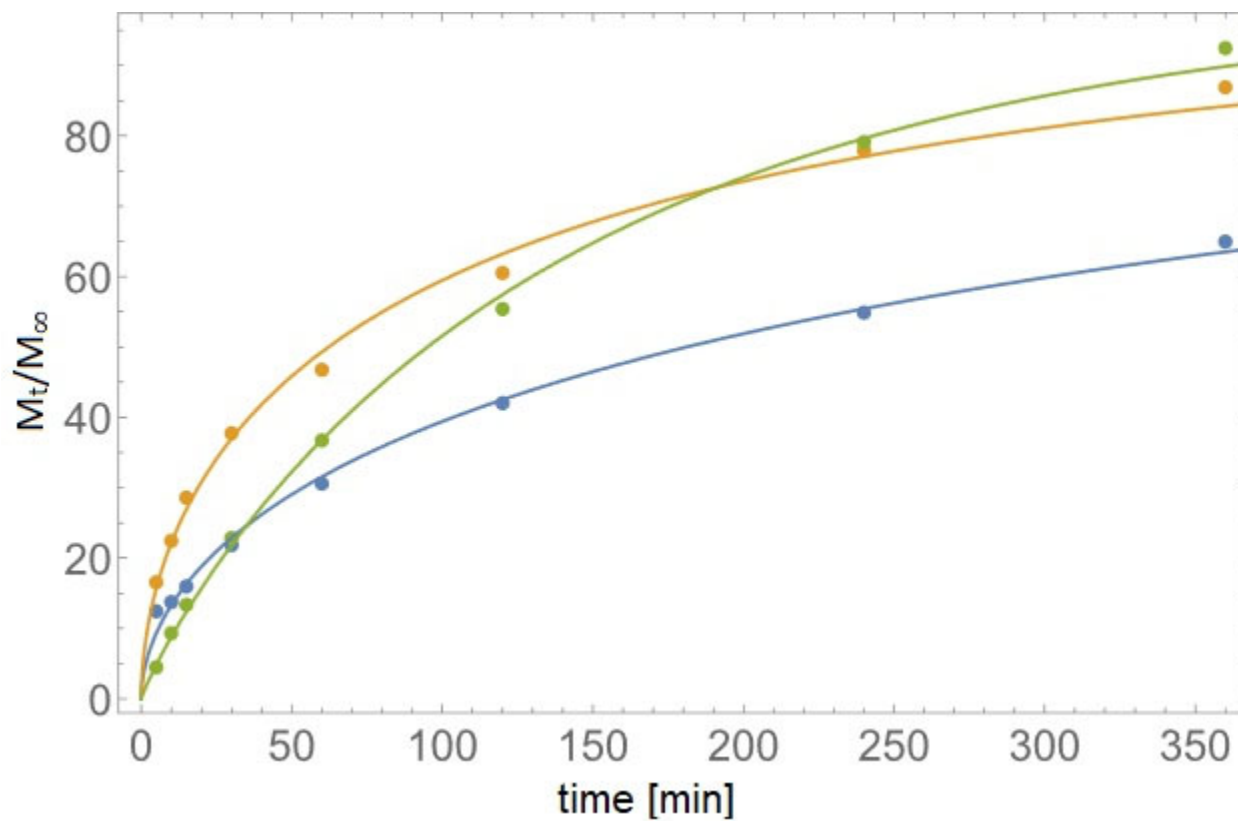

**Figure S29.** Plot of the fit to the Weibull model. In red is the function for the **D\_ClPh** formulation, in yellow for **A\_ClPh** and in blue for **BN**

**Table S35.** ANOVA for the Weibull model

|                          | BN |         |         | D_ClPh |         |         | A_ClPh |         |         |
|--------------------------|----|---------|---------|--------|---------|---------|--------|---------|---------|
|                          | DF | SS      | MS      | DF     | SS      | MS      | DF     | SS      | MS      |
| <b>Model</b>             | 2  | 10993   | 5496.48 | 2      | 22465   | 11232.5 | 2      | 20016.4 | 10008.2 |
| <b>Error</b>             | 6  | 14.7527 | 2.45878 | 6      | 26.1519 | 4.35865 | 6      | 13.6398 | 2.27331 |
| <b>Uncorrected Total</b> | 8  | 11007.7 |         | 8      | 22491.2 |         | 8      | 20030.1 |         |
| <b>Corrected Total</b>   | 7  | 2788.13 |         | 7      | 4684.11 |         | 7      | 7730.33 |         |

## Supplementary Materials

### The Mahalanobis distance

The Mahalanobis distance is the distance between release profiles that differentiates the respective components' contributions and exploits the correlations between them. We determined the mean, difference between the compared release profiles by determining the multivariate Mahalanobis distance (MSD) for each pair (BN vs. A\_CIPh and BN vs. D\_CIPh) along with the recommended 90% significance interval

**Table S36.** Mahalanobis distance (MSD)

| Comparison of the profiles | Distance between the profiles | lower limit of the confidence interval | upper limit of the confidence interval | acceptable distance between profiles |
|----------------------------|-------------------------------|----------------------------------------|----------------------------------------|--------------------------------------|
| BN vs. A_CIPh              | 13.1292                       | 6.29682                                | 19.9616                                | 8.06196                              |
| BN vs. D_CIPh              | 16.502                        | 9.670                                  | 23.334                                 | 9.709                                |

### Model independent coefficients of similarity and difference (F1,F2)

The parameters describing the release of 6 tested and reference formulation samples under identical conditions were determined, then for each time interval (j) the average percentage of released active substance from the tested formulation QT<sub>j</sub> and the reference formulation QR<sub>j</sub> was calculated. The release curves are considered similar when F1 is close to 0 ( 0-15 ) and F2 is close to 100 ( 50-100 )

**Table S37.** Similarity and difference coefficients (F1,F2)

| Formulation | Similarity factor F1 to the reference formulation (BN) | Difference factor F2 to reference formulation (BN) |
|-------------|--------------------------------------------------------|----------------------------------------------------|
| A_CIPh      | 27.81                                                  | 42.09                                              |
| D_CIPh      | 47.19                                                  | 39.37                                              |
